# Supplementary material
Source: PubMed Central journal article supplement (PMC4716604)
Supplement: ml5b00390_si_001.pdf [file ml5b00390_si_001.pdf]

# Probabilistic Approach to Generating MPOs and Its Application as a Scoring Function for CNS Drugs

Hakan Gunaydin

Department of Structural Chemistry, Merck & Co., Inc., 33 Avenue Louis Pasteur, Boston, MA, 02115, United States

The term brain penetrant drugs refers to drugs that interact with the targets that are expressed in the central nervous system or in the brain or have been shown to partition into the brain or central nervous system in the literature. The list of drugs used in this manuscript was compiled by starting with the FDA approved drug molecules that have molecular weights less than 850 and TPSA values less than 200. In addition, all prodrugs were removed from the dataset and the remainder of the FDA approved drugs was clustered to remove very similar drug molecules from the dataset. In this stage, only the cluster centers were selected from each drug cluster. This allowed the dataset to be diverse and representative of the drug space (for example by removing all structurally similar but one antibiotic from the dataset.) After this stage, a literature search on all of the drug molecules that are not approved for a CNS indication was conducted to see if there is any literature precedence for CNS exposure. This resulted in a dataset of 299 brain penetrant drugs and 366 drugs that haven't been reported to get into the brain or CNS.

The Bayesian model that was used to compare the accuracy of the results obtained from pMPO algorithm relative to more elaborate models is a two-class Bayesian categorization model based on molecular descriptors as implemented in pipeline pilot program by Biovia.

500 diverse molecules with PGP data was selected by querying Merck database for molecules with measured PGP data. Compound with passive permeabilities less than 10 nm/s and efflux ratio  $\geq 3$  in the parental cell lines were removed from this list. After that, 500 diverse molecules were selected by using the pipeline pilot component for selecting diverse molecules by using properties FCFP\_6, Molecular Weight, number of hydrogen bond donors and TPSA. This selection was biased towards picking molecules that had had equal distribution of molecules with effective PGP ratios  $\leq 2$  (175 molecules), between 2 and 10 (166 molecules) and greater than 10 (159 molecules).

Table S1: Descriptors and the parameters used for equation 2 and probability distributions for the desirability function in pMPO.

| Descriptor    | $\bar{x}_d$ | $\sigma_d$ | $\bar{x}_{nd}$ | $\sigma_{nd}$ | $x$ | $b$     | $c$     |
|---------------|-------------|------------|----------------|---------------|-----|---------|---------|
| TPSA          | 51          | 28         | 87             | 39            | 66  | 0.152   | 0.794   |
| HBD           | 1           | 1          | 2              | 1.4           | 1.5 | 0.094   | 9.52E-5 |
| MW            | 305         | 94         | 399            | 136           | 328 | 0.032   | 0.913   |
| cLogD_ACD_v15 | 1.8         | 1.9        | 0.8            | 2.8           | 1.4 | 0.021   | 1.32E+5 |
| bmpKa         | 8.1         | 2.2        | 7.2            | 2.7           | 7.7 | 1.73E-2 | 1.46E+6 |

Figure S2: comparison between pMPO desirability functions and Bayesian probabilities for all 5 descriptors.

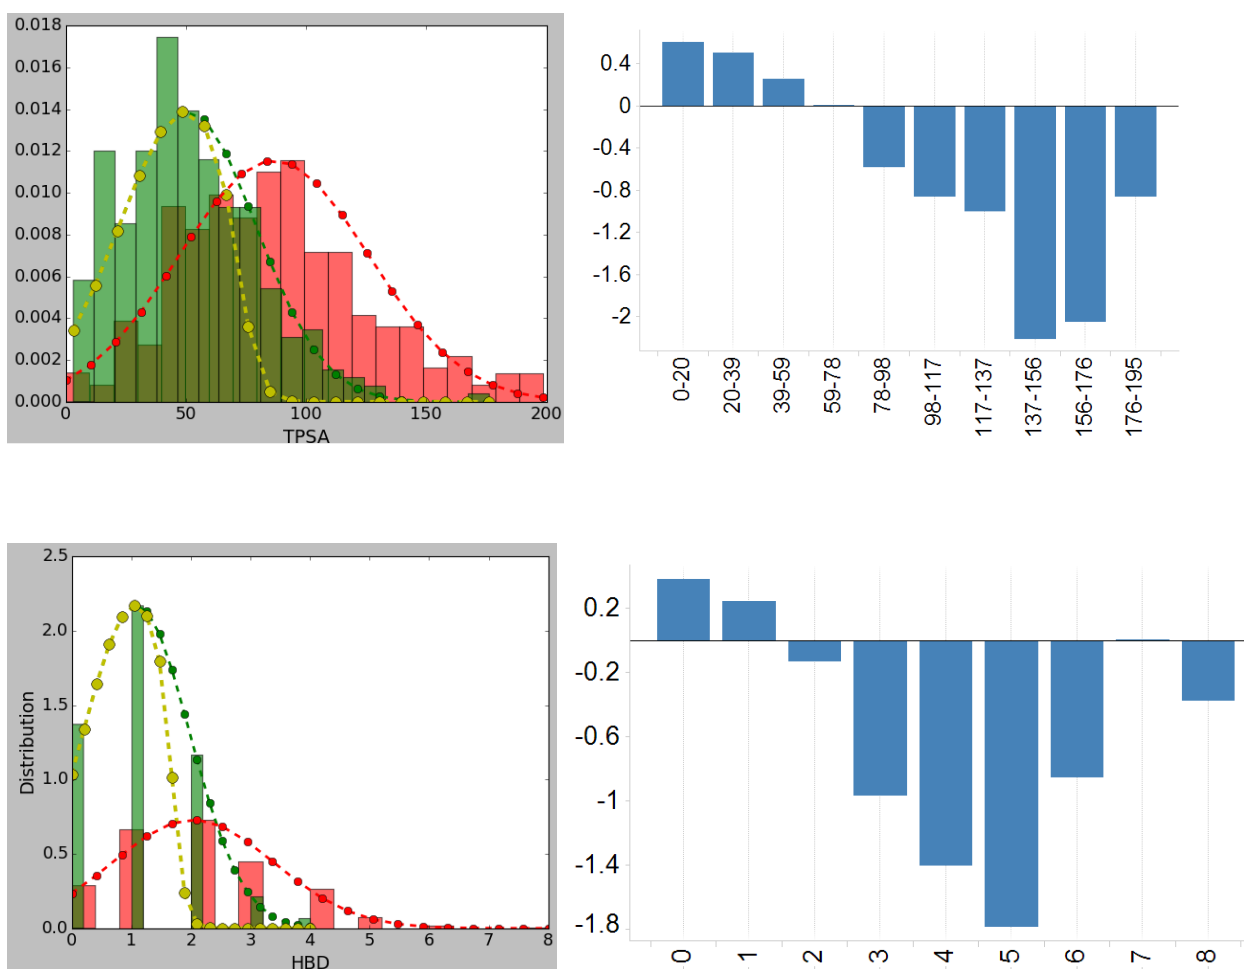

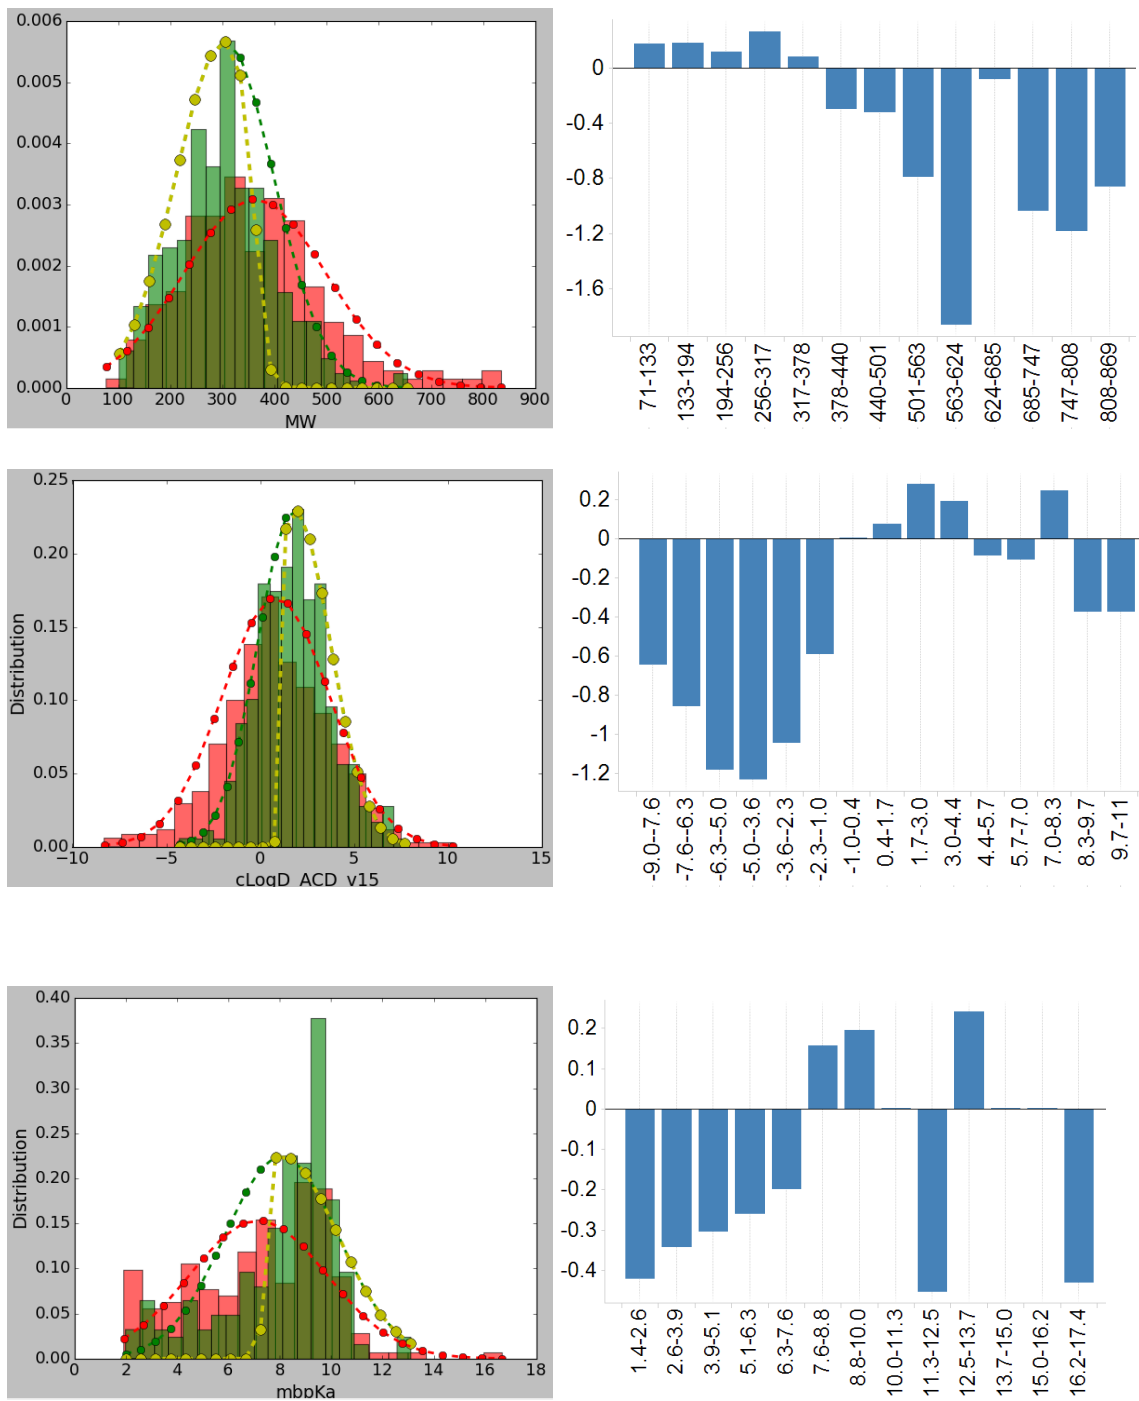

Figure S3: Comparison of the CNS MPO (along x-axis) and pMPO<sub>CNS</sub> scores (along y-axis) for 500 molecules with measured efflux ratios.

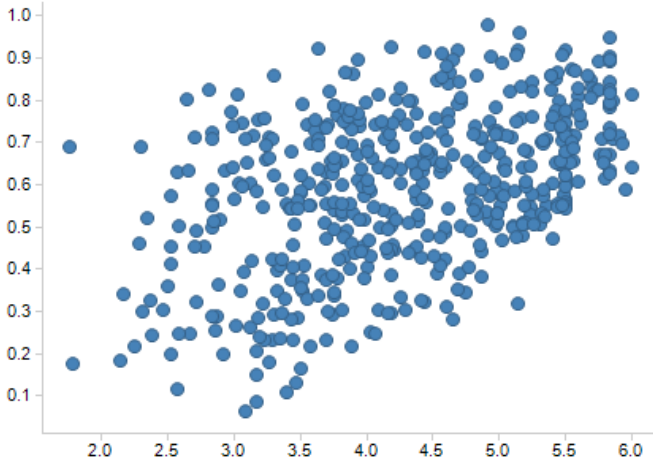

Figure S4: pMPO<sub>CNS</sub> against rPgp effective efflux ratio on the left and CNS MPO against rPgp effective efflux ratio on the right.

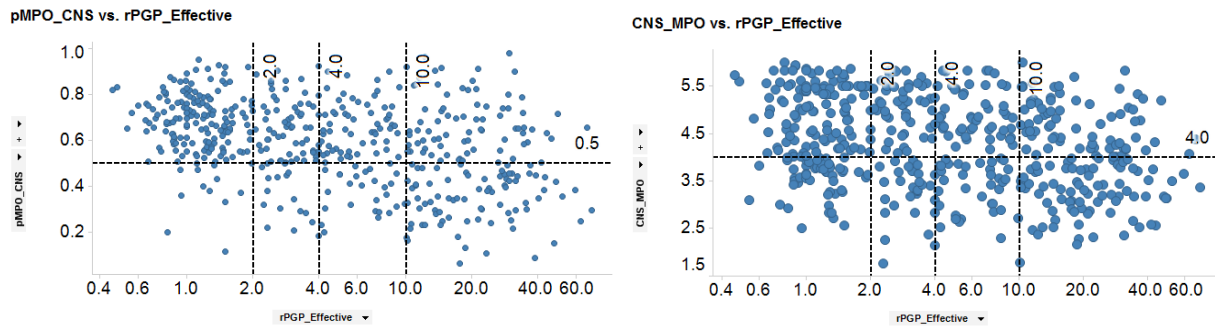

Figure S5: Property distributions for the 500 molecules with measured efflux ratios.

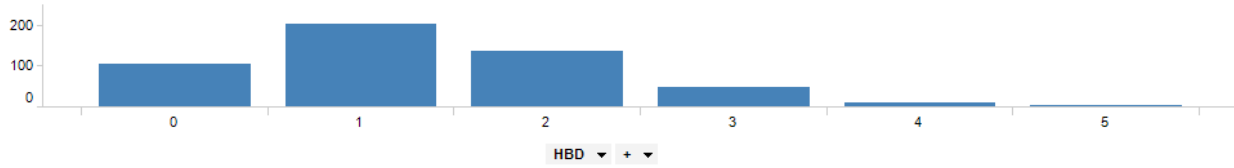

:hart

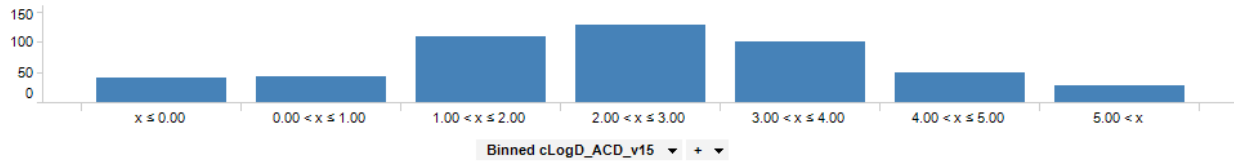

:hart

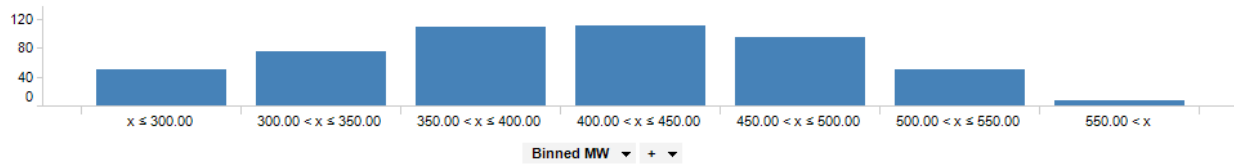

:hart

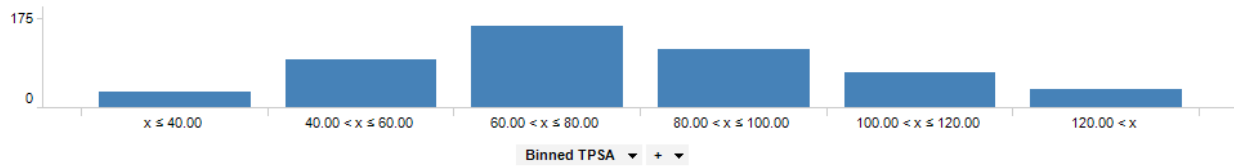

## Python script for plotting distributions of CNS and non-CNS drugs:

```
#!/usr/bin/env python
import random
import sys
import matplotlib.pyplot as plt
import numpy
import scipy
from scipy.stats import norm

rn_cutoff = 1.0
q_cutoff = 0.05

def fitfn(x, p0, p1, p2):
    return p0*numpy.exp(-(x-p1)**2/(2.*p2**2))

def sigfn(x, x0, b, c):
    return 1.0/(1.0+b*numpy.power(c,-1.0*(x-x0)))

def findhistmax(x, y, meanvalue):
    n = -1
    for i in range(len(x)):
        n += 1
        if x[i] > meanvalue: break
    return max([y[n], y[n-1], y[n+1]])

def find_cutoff(desired, notdesired):
    '''pass the arrays in the form of [mean, std] for the desired and notdesired groups
    return an array in this form of [cutoff_intercept, cutoff_pref, cutoff_notpref, std_pref, std_notpref]'''
    if desired[0] < notdesired[0]:
        cutoff = ((notdesired[0]-desired[0])/(desired[1]+notdesired[1]))*desired[1]+desired[0]
        cutoff_pref = max(desired[0], notdesired[0]-notdesired[1])
        cutoff_notpref = max(desired[0]+desired[1], notdesired[0])
        std_pref = desired[1]
        std_not = notdesired[1]
    else:
        cutoff = ((desired[0]-notdesired[0])/(desired[1]+notdesired[1]))*notdesired[1]+notdesired[0]
        cutoff_pref = min(notdesired[0]+notdesired[1], desired[0])
        cutoff_notpref = max(notdesired[0], desired[0]-desired[1])
    return [cutoff, cutoff_pref, cutoff_notpref, desired[1], notdesired[1]]

def sigmoidal_fn(boundaries):
    '''
    f(x) = -----
            1
            -1(x-<x>)
            1 + b c
    when c > 1, it starts from 0 and goes up to 1
    when 0 < c < 1, it starts from 1 and goes down to 0
    '''
```

```

        inflection point is 1/(1+b)
        slope is related to the magnitude of c'''
    global q_cutoff
    if boundaries[1] < boundaries[2]:
        inf_point_y = fitfn(boundaries[0], 1.0, boundaries[1], boundaries[3])
        b = 1./inf_point_y - 1.0
        n = 1.0/q_cutoff - 1.0
        c = numpy.power(10.0, ((numpy.log10(n/b))/(-1.0*(boundaries[2]-boundaries[0])))
    elif boundaries[1] > boundaries[2]:
        inf_point_y = fitfn(boundaries[0], 1.0, boundaries[1], boundaries[3])
        b = 1./inf_point_y - 1.0
        n = 1.0/q_cutoff - 1.0
        c = numpy.power(10.0, ((numpy.log10(n/b))/(-1.0*(boundaries[2]-boundaries[0])))
    return [b, c]

fin = open('drugs_props.txt', 'r')
line = fin.readline()
line = line.replace('\n', '')
header = line.split('\t')

#n_column = [y for y, x in enumerate(header) if (x == 'Mw')][0]
n_column = [y for y, x in enumerate(header) if (x == 'TPSA')][0]
#n_column = [y for y, x in enumerate(header) if (x == 'TPSA_S')][0]
#n_column = [y for y, x in enumerate(header) if (x == 'cLogP_ACD_v15')][0]
#n_column = [y for y, x in enumerate(header) if (x == 'cLogP_ACD_v15')][0]
#n_column = [y for y, x in enumerate(header) if (x == 'mbpka')][0]
#n_column = [y for y, x in enumerate(header) if (x == 'mapka')][0]
#n_column = [y for y, x in enumerate(header) if (x == 'HBA')][0]
#n_column = [y for y, x in enumerate(header) if (x == 'HBD')][0]
#n_column = [y for y, x in enumerate(header) if (x == 'cLogP_Biobyte')][0]
#n_column = [y for y, x in enumerate(header) if (x == 'ALogP98')][0]
#n_column = [y for y, x in enumerate(header) if (x == 'nAtoms')][0]
#n_column = [y for y, x in enumerate(header) if (x == 'nArom')][0]
#n_column = [y for y, x in enumerate(header) if (x == 'fsp3')][0]

cns = []
notcns = []

while 1:
    line = fin.readline()
    if not line: break
    line = line.replace('\n', '')
    line = line.split('\t')
    if line[1] == 'TRUE' and int(line[[y for y, x in enumerate(header) if (x == 'nAtoms')][0]]) > 5:
        try:
            if random.random() <= rn_cutoff:
                cns.append(float(line[n_column]))
        except:
            pass
    elif line[1] == 'FALSE' and int(line[[y for y, x in enumerate(header) if (x == 'nAtoms')][0]]) > 5:
        try:
            if random.random() <= rn_cutoff:
                notcns.append(float(line[n_column]))
        except:
            pass

print 'Stats for descriptor: %s' % (header[n_column])
print 'p-value: %2e (%.4f)' % (scipy.stats.ttest_ind(cns, notcns, equal_var=False)[1], scipy.stats.ttest_ind(cns, notcns, equal_var=False)[1])
print '%s\t%.3f +/- %.3f' % ('for CNS drugs', numpy.mean(cns), numpy.std(cns))
print '%s\t%.3f +/- %.3f' % ('for non-CNS drugs', numpy.mean(notcns), numpy.std(notcns))

print ''
print 'len(cns):', len(cns)
print 'len(notcns):', len(notcns)
print ''

cutoffs = find_cutoff([numpy.mean(cns), numpy.std(cns)], [numpy.mean(notcns), numpy.std(notcns)])
print 'cutoff: %.3f\t<x_d>: %.3f\t<x_und>: %.3f\tstd_d: %.3f\tstd_und: %.3f' % (cutoffs[0], cutoffs[1], cutoffs[2], cutoffs[3], cutoffs[4])
sig_fn_coeff = sigmoidal_fn(cutoffs)
print 'b: %2e\tc: %2e' % (sig_fn_coeff[0], sig_fn_coeff[1])

a, b, c = plt.hist(notcns, color='r', alpha=0.6, bins=20, normed=True)
y, x, p = plt.hist(cns, color='g', alpha=0.6, bins=20, normed=True)
x = numpy.linspace(min(x), max(x), len(y))
b = numpy.linspace(min(b), max(b), len(a))

pdf = fitfn(x, findhistmax(x, y, numpy.mean(cns), numpy.mean(cns), numpy.std(cns))
plt.plot(x, pdf, 'k', linewidth=2.5, color='g', linestyle='--', marker='o', markersize=8)
pdf3 = []
for i in range(len(pdf)):
    pdf3.append(pdf[i]*sigfn(x[i], cutoffs[0], sig_fn_coeff[0], sig_fn_coeff[1]))
plt.plot(x, pdf3, 'k', linewidth=3.5, color='y', linestyle='--', marker='o', markersize=10)

pdf2 = fitfn(b, findhistmax(b, a, numpy.mean(notcns), numpy.mean(notcns), numpy.std(notcns))
plt.plot(b, pdf2, 'k', linewidth=2.5, color='r', linestyle='--', marker='o', markersize=8)

plt.xlabel(header[n_column], size='x-large')
plt.ylabel('Distribution', size='x-large')
plt.tick_params(axis='both', which='major', labelsize=16)

plt.show()

```

Python script for plotting determining uncorrelated descriptors for pMPO generation:

```

#!/usr/bin/env python

import random
import sys
import numpy
import scipy
from scipy.stats import norm
from operator import itemgetter

rn_cutoff = 1.0
q_cutoff = 0.05
r2_cutoff = 0.53
pval_cutoff = 0.01

```

```

def fitfn(x, p0, p1, p2):
    return p0*numpy.exp(-(x-p1)**2/(2.*p2**2))

def sigfn(x, x0, b, c):
    return 1.0/(1.0+b*numpy.power(c,-1.0*(x-x0)))

def findhistmax(x, y, meanvalue):
    n = -1
    for i in range(len(x)):
        n += 1
        if x[i] > meanvalue: break
    return max([y[n], y[n-1], y[n+1]])

def find_cutoff(desired, notdesired):
    '''pass the arrays in the form of [mean, std] for the desired and notdesired groups
    return an array in this form of [cutoff_intercept, cutoff_pref, cutoff_notpref, std_pref, std_notpref]'''
    if desired[0] < notdesired[0]:
        cutoff = ((notdesired[0]-desired[0])/(desired[1]+notdesired[1]))*desired[1]+desired[0]
        cutoff_pref = max(desired[0], notdesired[0]-notdesired[1])
        cutoff_notpref = max(desired[0]+desired[1], notdesired[0])
        std_pref = desired[1]
        std_not = notdesired[1]
    else:
        cutoff = ((desired[0]-notdesired[0])/(desired[1]+notdesired[1]))*notdesired[1]+notdesired[0]
        cutoff_pref = min(notdesired[0]+notdesired[1], desired[0])
        cutoff_notpref = max(notdesired[0], desired[0]-desired[1])
    return [cutoff, cutoff_pref, cutoff_notpref, desired[1], notdesired[1]]

def sigmoidal_fn(boundaries):
    '''
    f(x) = -----
            1
            1 + b c
            -1(x-<x>)

    when c > 1, it starts from 0 and goes up to 1
    when 0 < c < 1, it starts from 1 and goes down to 0
    inflection point is 1/(1+b)
    slope is related to the magnitude of c'''
    global q_cutoff
    if boundaries[1] < boundaries[2]:
        inf_point_y = fitfn(boundaries[0], 1.0, boundaries[1], boundaries[3])
        b = 1./inf_point_y - 1.0
        n = 1.0/q_cutoff - 1.0
        c = numpy.power(10.0, ((numpy.log10(n/b))/(-1.0*(boundaries[2]-boundaries[0]))))
    elif boundaries[1] > boundaries[2]:
        inf_point_y = fitfn(boundaries[0], 1.0, boundaries[1], boundaries[3])
        b = 1./inf_point_y - 1.0
        n = 1.0/q_cutoff - 1.0
        c = numpy.power(10.0, ((numpy.log10(n/b))/(-1.0*(boundaries[2]-boundaries[0]))))
    return [b, c]

def findr2(x, y):
    correlation = numpy.corrcoef(x, y)[0,1]
    return correlation**2

fin = open('drugs_props.txt', 'r')
line = fin.readline()
line = line.replace('\n', '')
header = line.split('\t')

desired = []
notdesired = []
cluster = []

while 1:
    line = fin.readline()
    if not line: break
    line = line.replace('\n', '')
    line = line.split('\t')
    cluster_num = int(line[0])
    if cluster_num not in cluster:
        # cluster.append(cluster_num)
        if line[1] == 'TRUE':
            if random.random() <= rn_cutoff:
                desired.append(line[2:16])
        elif line[1] == 'FALSE':
            if random.random() <= rn_cutoff:
                notdesired.append(line[2:16])
    else:
        pass

descs = header[2:16]
statistics = []

for i in range(len(descs)):
    cns = []
    notcns = []
    for j in range(len(desired)):
        try:
            cns.append(float(desired[j][i]))
        except:
            pass
    for j in range(len(notdesired)):
        try:
            notcns.append(float(notdesired[j][i]))
        except:
            pass
    pval = scipy.stats.ttest_ind(cns, notcns, equal_var=False)[1]
    statistics.append([descs[i], pval, numpy.mean(cns), numpy.std(cns), numpy.mean(notcns), numpy.std(notcns), len(cns), len(notcns)])

statistics = sorted(statistics, key=itemgetter(1))

corr_matrix = [[0 for xx in range(len(statistics))] for xx in range(len(statistics))]
for m in range(len(statistics)):
    for n in range(len(statistics)-1-m):
        n1 = [y for y, x in enumerate(descs) if (x == statistics[m][0])]
        n2 = [y for y, x in enumerate(descs) if (x == statistics[m+n+1][0])]
        des1 = []
        des2 = []
        for i in range(len(desired)):
            if desired[i][n1] != '' and desired[i][n2]:
                des1.append(float(desired[i][n1]))
                des2.append(float(desired[i][n2]))

```





|                     |       |           |        |    |                                                         |           |                                                       |           |       |       |       |       |      |
|---------------------|-------|-----------|--------|----|---------------------------------------------------------|-----------|-------------------------------------------------------|-----------|-------|-------|-------|-------|------|
| Ambrisentan         | FALSE | 81.54     | 81.54  | 6  | 1                                                       | 378.42108 | 28                                                    | 2.51      | 0.97  | 3.75  | 2.84  | 6.24  |      |
| Amiloride           | FALSE | 3.659     | 0.23   | 3  | 0=C(O)[C@@H](O)C1=CC(=O)C(C)C(OC)C2=CC=CC=C2C3=CC=CC=C3 | 4         | 229.62702                                             | 15        | 2.9   |       | -2.22 | 2.29  | 2.9  |
| Aminocaproic acid   | FALSE | 159.29    | 159.29 | 1  | C1=CC=C(C=C1)N(C)C(=O)N                                 | 2         | 131.17292                                             | 9         | -2.61 | 4.68  | -2.23 | 10.63 |      |
| Aminosalicylic acid | FALSE | -0.11     | 0.315  | 0  | 0.83                                                    | 3         | 153.13538                                             | 11        | -3    | 3.58  | 1.06  | 2.21  |      |
| Amoxicillin         | FALSE | 1.14      | 0.471  | 0  | 83.55                                                   | 4         | 0=C(O)C1=CC=C(C=C1)N                                  | 25        | -2.58 | 2.44  | -1.87 | 6.67  | 0.61 |
| Amprenavir          | FALSE | 132.96    | 158.26 | 7  | 0.44                                                    | 1         | 365.40416                                             | 25        | 4.2   | 3.29  | 4.2   | 4.2   |      |
| Anagrelide          | FALSE | -6.00E-02 | 0.44   | 1  | 131.19                                                  | 2         | 505.62689                                             | 35        | 4.2   | 1.8   | 2.08  | 1.96  |      |
| Anastrozole         | FALSE | 2.429     | 0.48   | 2  | 44.7                                                    | 4         | 256.08808                                             | 16        | 1.96  | 1.8   | 2.08  | 1.96  |      |
| Anisindione         | FALSE | 1.965     | 0.2    | 1  | 78.29                                                   | 4         | 293.36625                                             | 22        | 0.97  | 1.48  | 2.62  | 0.97  |      |
| Anisotropine        | FALSE | 2.965     | 0.41   | 2  | 43.37                                                   | 3         | 252.26468                                             | 19        | 3.19  | 2.73  | 3.21  |       |      |
| Apixaban            | FALSE | 43.37     | 43.37  | 3  | 0.12                                                    | 2         | 0=C2C1=CC=CC=C1C(=O)C2=C3C=CC(=O)C=C3                 | 20        | 0.43  | -0.82 |       |       |      |
| Aspirin             | FALSE | 2.803     | 0.2    | 2  | 26.3                                                    | 2         | 0                                                     | 282.44148 | 20    | 0.43  |       |       |      |
| Astemizole          | FALSE | 0.43      | 2.249  | 0  | 0.94                                                    | 0         | [C@@H]12[N+](=O)[C@@H](C)C(C)C(=O)C(C)C               | 34        | 0.48  | 1.89  | 0.48  |       |      |
| Atazanavir          | FALSE | 110.76    | 110.76 | 5  | 110.76                                                  | 5         | 0=C5N(C4=CC=C(N3C(=O)C1=C(C#N)C(C)C=C1)C(C)C)C(C)C    | 34        | 0.48  | 1.89  | 0.48  |       |      |
| Atenolol            | FALSE | 2.865     | 0.28   | 3  | 63.6                                                    | 4         | 180.15743                                             | 31        | -1.89 | 3.48  | 1.02  | 1.19  |      |
| Atorvastatin        | FALSE | 1.227     | 0.11   | 1  | 42.32                                                   | 4         | 0=C(O)C1=CC=CC=C1C(=O)C                               | 34        | 4.41  | 5.84  | 8.77  | 5.8   |      |
| Atovaquone          | FALSE | 42.32     | 42.32  | 4  | 5.689                                                   | 4         | Fc1ccc(cc1)Cn2c5cccnc2Nc4cnc(ccc3ccc(cc)cc3)CC4       | 51        | 5.2   | 5.92  | 4.65  | 5.2   |      |
| Avanafil            | FALSE | 171.21    | 171.21 | 9  | 5.078                                                   | 3         | 704.85548                                             | 51        | 5.2   | 5.92  | 4.65  | 5.2   |      |
| Azathioprine        | FALSE | 0.67      | 0.934  | 3  | 0.669                                                   | 5         | 0=C(O)C(N)[C@@H](C(=O)N)[C@@H](C)C1=CC=CC=C1          | 19        | -1.99 | -0.11 | 9.45  | 0.1   |      |
| Azilsartan          | FALSE | 111.79    | 111.79 | 4  | 111.79                                                  | 5         | 0=C(N)C1=CC=C(C=C1)C(C)C                              | 19        | -1.99 | -0.11 | 9.45  | 0.1   |      |
| Azithromycin        | FALSE | 5.556     | 0.27   | 4  | 54.37                                                   | 3         | 0=C(O)C1=CC=C(C=C1)C(C)C                              | 19        | -1.99 | -0.11 | 9.45  | 0.1   |      |
| Balsalazide         | FALSE | 54.37     | 54.37  | 3  | 0.27                                                    | 2         | 0=C(O)C1=CC=C(C=C1)C(C)C                              | 19        | -1.99 | -0.11 | 9.45  | 0.1   |      |
| Bedaquiline         | FALSE | 5.319     | 0.27   | 2  | 125.39                                                  | 3         | 0=C2C(=O)C1=CC=CC=C1C(=O)C2=C3C=CC(=O)C=C3            | 34        | 4.99  | 6.35  | 6.17  | 6.17  |      |
| Benazepril          | FALSE | 125.39    | 125.39 | 3  | 0.35                                                    | 3         | 0=C2C(=O)C1=CC=CC=C1C(=O)C2=C3C=CC(=O)C=C3            | 34        | 4.99  | 6.35  | 6.17  | 6.17  |      |
| Bendroflumethiazide | FALSE | 2.165     | 0.35   | 3  | 118.1                                                   | 3         | C1=CC(OC)C=C1CNC3=CC(=O)NCC2=CC=CC=C2N4[C@@H](CCCC)CO | 34        | 3.5   | 2.91  | 6.73  | 3.52  |      |
| Bentiromide         | FALSE | 0.67      | 0.934  | 3  | 139.57                                                  | 11        | 143.39                                                | 7         | 1     | 0.63  | 7.73  | 0.51  |      |
| Betamethasone       | FALSE | 139.57    | 139.57 | 11 | 0.17                                                    | 4         | [O-][N+](=O)[C@@H](C)C3=CC=CC=C3C                     | 19        | 5.72  | 4.61  | 5.25  | 5.73  |      |
| Betaxolol           | FALSE | 5.27      | 0.17   | 4  | 180.08                                                  | 5         | 0=C1O/C=C(C=C1)C(=O)C(=O)C                            | 34        | 1.4   | 2.64  | 8.59  | 2.64  |      |
| Bethanechol         | FALSE | 180.08    | 180.08 | 5  | 0.97                                                    | 0         | 748.98448                                             | 52        | 1.4   | 2.64  | 8.59  | 2.64  |      |
| Bicalutamide        | FALSE | 3.33      | 2.078  | 0  | 148.64                                                  | 8         | 0                                                     | 26.33608  | 19    | -1.99 | -0.11 | 9.45  |      |
| Bisoprolol          | FALSE | 148.64    | 148.64 | 8  | 0.12                                                    | 2         | 0=C(N)C1=CC=C(C=C1)C(C)C                              | 19        | -1.99 | -0.11 | 9.45  | 0.1   |      |
| Boceprevir          | FALSE | 45.59     | 45.59  | 4  | 0.22                                                    | 2         | 0=C(O)C1=CC=C(C=C1)C(C)C                              | 19        | -1.99 | -0.11 | 9.45  | 0.1   |      |
| Bosentan            | FALSE | 6.933     | 0.22   | 2  | 95.94                                                   | 5         | 0=C(O)C1=CC=C(C=C1)C(C)C                              | 19        | -1.99 | -0.11 | 9.45  | 0.1   |      |
| Bosutinib           | FALSE | 95.94     | 95.94  | 5  | 3.326                                                   | 2         | 0=C(O)C1=CC=C(C=C1)C(C)C                              | 19        | -1.99 | -0.11 | 9.45  | 0.1   |      |
| Budesonide          | FALSE | 3.326     | 0.38   | 2  | 118.36                                                  | 5         | 0=C(O)C1=CC=C(C=C1)C(C)C                              | 19        | -1.99 | -0.11 | 9.45  | 0.1   |      |
| Bufuralol           | FALSE | 1.861     | 0.2    | 2  | 115.73                                                  | 5         | 0=C(O)C1=CC=C(C=C1)C(C)C                              | 19        | -1.99 | -0.11 | 9.45  | 0.1   |      |
| Busulfan            | FALSE | 115.73    | 115.73 | 5  | 0.09                                                    | 3         | 0=C(O)C1=CC=C(C=C1)C(C)C                              | 19        | -1.99 | -0.11 | 9.45  | 0.1   |      |
| Cabozantinib        | FALSE | 3.102     | 0.09   | 3  | 94.83                                                   | 5         | 0=C(O)C1=CC=C(C=C1)C(C)C                              | 19        | -1.99 | -0.11 | 9.45  | 0.1   |      |
| Canagliflozin       | FALSE | 1.87      | 0.707  | 0  | 50.72                                                   | 4         | 0=C(O)C1=CC=C(C=C1)C(C)C                              | 19        | -1.99 | -0.11 | 9.45  | 0.1   |      |
| Capecitabine        | FALSE | 50.72     | 50.72  | 4  | 0.67                                                    | 1         | 0=C(O)C1=CC=C(C=C1)C(C)C                              | 19        | -1.99 | -0.11 | 9.45  | 0.1   |      |
| Carbenicillin       | FALSE | -2.577    | 0.67   | 1  | 52.32                                                   | 2         | 0=C(O)C1=CC=C(C=C1)C(C)C                              | 19        | -1.99 | -0.11 | 9.45  | 0.1   |      |
| Carbidopa           | FALSE | 52.32     | 52.32  | 2  | 0.86                                                    | 0         | 0=C(O)C1=CC=C(C=C1)C(C)C                              | 19        | -1.99 | -0.11 | 9.45  | 0.1   |      |
| Carglumic acid      | FALSE | -1.028    | 0.86   | 0  | 107.26                                                  | 5         | 0=C(O)C1=CC=C(C=C1)C(C)C                              | 19        | -1.99 | -0.11 | 9.45  | 0.1   |      |
| Carprofen           | FALSE | 107.26    | 107.26 | 5  | 4.94                                                    | 2         | 0=C(N)C1=CC=C(C=C1)C(C)C                              | 19        | -1.99 | -0.11 | 9.45  | 0.1   |      |
| Carteolol           | FALSE | 2.926     | 0.22   | 2  | 59.95                                                   | 5         | 0=C(N)C1=CC=C(C=C1)C(C)C                              | 19        | -1.99 | -0.11 | 9.45  | 0.1   |      |
| Cefaclor            | FALSE | 59.95     | 59.95  | 5  | 0.67                                                    | 1         | 0=C(N)C1=CC=C(C=C1)C(C)C                              | 19        | -1.99 | -0.11 | 9.45  | 0.1   |      |
| Cefdinir            | FALSE | 150.7     | 150.7  | 5  | 0.81                                                    | 0         | 0=C(N)C1=CC=C(C=C1)C(C)C                              | 19        | -1.99 | -0.11 | 9.45  | 0.1   |      |
| Cefditoren          | FALSE | 150.7     | 150.7  | 5  | 0.81                                                    | 0         | 0=C(N)C1=CC=C(C=C1)C(C)C                              | 19        | -1.99 | -0.11 | 9.45  | 0.1   |      |
| Cefepime            | FALSE | 150.7     | 150.7  | 5  | 0.81                                                    | 0         | 0=C(N)C1=CC=C(C=C1)C(C)C                              | 19        | -1.99 | -0.11 | 9.45  | 0.1   |      |
| Cefuroxime          | FALSE | 150.7     | 150.7  | 5  | 0.81                                                    | 0         | 0=C(N)C1=CC=C(C=C1)C(C)C                              | 19        | -1.99 | -0.11 | 9.45  | 0.1   |      |
| Celecoxib           | FALSE | 150.7     | 150.7  | 5  | 0.81                                                    | 0         | 0=C(N)C1=CC=C(C=C1)C(C)C                              | 19        | -1.99 | -0.11 | 9.45  | 0.1   |      |
| Ceritinib           | FALSE | 150.7     | 150.7  | 5  | 0.81                                                    | 0         | 0=C(N)C1=CC=C(C=C1)C(C)C                              | 19        | -1.99 | -0.11 | 9.45  | 0.1   |      |
| Cerivastatin        | FALSE | 150.7     | 150.7  | 5  | 0.81                                                    | 0         | 0=C(N)C1=CC=C(C=C1)C(C)C                              | 19        | -1.99 | -0.11 | 9.45  | 0.1   |      |
| Cetirizine          | FALSE | 150.7     | 150.7  | 5  | 0.81                                                    | 0         | 0=C(N)C1=CC=C(C=C1)C(C)C                              | 19        | -1.99 | -0.11 | 9.45  | 0.1   |      |

|                         |       |        |        |      |   |           |    |           |      |       |       |       |
|-------------------------|-------|--------|--------|------|---|-----------|----|-----------|------|-------|-------|-------|
| Chenodiol               | FALSE | 77.76  | 77.76  | 4    | 3 | 392.572   | 28 | 2.05      | 4.76 | 4.51  | 4.66  |       |
| Chlorambucil            | FALSE | 4.014  | 0.96   | 0    | 3 |           |    |           |      |       |       |       |
| Chloroquine             | FALSE | 3.1    | 3.899  | 0.5  | 1 | 1         | 1  | 304.21216 | 19   | 0.55  | 4.82  | 3.63  |
| Chlorotrianiene         | FALSE | 4.345  | 28.16  | 0.5  | 2 | 1         | 1  | 319.87213 | 22   | 1.87  | 5.06  | 10.47 |
| Chlorphenesin carbamate | FALSE | 1.41   | 1.597  | 0.3  | 1 | 1         | 1  |           |      |       |       |       |
| Chlorpropamide          | FALSE | 2.3    | 2.058  | 0.3  | 1 | 1         | 1  | 276.73982 | 17   | 0.33  | 4.64  | 2.35  |
| Chlorthalidone          | FALSE | -0.74  | 1.383  | 0.07 | 2 | 0         | 0  |           |      |       |       |       |
| Cimetidine              | FALSE | 88.89  | 114.19 | 6    | 3 | 252.33923 | 17 | -0.25     |      |       | 0.19  | 7.13  |
| Cinoxacin               | FALSE | 1.448  | 0.25   | 1    | 1 | 262.2182  | 19 | -3.39     |      |       | 1.74  | 4.33  |
| Ciprofloxacin           | FALSE | 0.65   | 1.435  | 0.41 | 1 | 1         | 1  | 331.34152 | 24   | -1.28 | 6.27  | -0.22 |
| Cisapride               | FALSE | 2.785  | 0.43   | 2    | 2 | 465.94546 | 32 | 2.75      |      |       | 3.81  | 8.65  |
| Clavulanate             | FALSE | 87.07  | 87.07  | 5    | 5 | 199.16076 | 14 | -5.39     | 3.64 |       | -1.06 | -1.98 |
| Clindamycin             | FALSE | 1.277  | 102.26 | 0.5  | 0 | 424.98302 | 27 | 0.78      |      |       | 2.57  | 8.74  |
| Clofazimine             | FALSE | 7.137  | 0.11   | 3    | 3 | 473.39638 | 33 | 5.6       |      |       | 7.7   | 8.64  |
| Clofibrate              | FALSE | 3.529  | 35.53  | 0.42 | 1 | 242.6987  | 16 | 3.32      |      |       | 3.68  | 3.32  |
| Clomiphene              | FALSE | 6.483  | 0.23   | 3    | 3 | 405.95962 | 29 | 5.87      |      |       | 7.15  | 9.6   |
| Clonidine               | FALSE | 2.354  | 36.42  | 0.22 | 1 | 230.09386 | 14 | 0.65      |      |       | 1.73  | 8.1   |
| Cloxacillin             | FALSE | 112.74 | 138.04 | 2.3  | 2 | 435.88131 | 29 | -1.2      | 2.44 |       | 2.52  | 2.53  |
| Cobicistat              | FALSE | 138.02 | 194.5  | 0.47 | 4 | 776.02272 | 54 | 4.59      |      |       | 3.98  | 7.4   |
| Colchicine              | FALSE | 2.044  | 83.09  | 0.36 | 1 | 399.43699 | 29 | 0.92      |      |       | 1.2   | 0.92  |
| Crizotinib              | FALSE | 3.694  | 77.98  | 0.33 | 3 | 450.33668 | 30 | 2.25      |      |       | 4.29  | 9.81  |
| Cromolyn                | FALSE | 1.77   | 165.89 | 0.13 | 2 | 468.36653 | 34 | -2.45     | 1.94 |       | 1.48  | 2.3   |
| Cyclacillin             | FALSE | 0.391  | 112.73 | 0.8  | 0 | 341.42582 | 23 | -2.23     | 2.45 |       | -0.82 | 7.36  |
| Cyclophosphamide        | FALSE | 0.23   | 26.02  | 0.33 | 1 | 261.08596 | 14 | 0.23      |      |       | 0.8   | 2.84  |
| Cysteamine              | FALSE | -0.216 | 1      | 0    | 2 | 77.14868  | 4  | -1.49     |      |       | -0.25 | 10.34 |
| Dabrafenib              | FALSE | 5.423  | 110.85 | 0.17 | 4 | 519.5624  | 35 | 2.64      | 6.45 |       | 4.61  | 3.54  |
| Dantrolene              | FALSE | 1.984  | 120.72 | 0.07 | 2 | 314.253   | 23 | 1.24      | 7.69 |       | 1.63  | 1.43  |
| Dapagliflozin           | FALSE | 4.42   | 2.409  | 0.43 | 2 | 408.8726  | 28 | 4.42      |      |       | 3.37  |       |
| Darifenacin             | FALSE | 4.558  | 55.56  | 0.32 | 3 | 426.54999 | 32 | 2.66      |      |       | 3.62  | 9.32  |
| Deferasirox             | FALSE | 2.971  | 98.74  | 0.1  | 1 | 373.3615  | 28 | -1.92     |      |       | 2.54  | 0.46  |
| Delavirdine             | FALSE | 2.292  | 110.43 | 0.36 | 3 | 456.56111 | 32 | -2.29     |      |       | 2.92  | -1.21 |
| Demeclocycline          | FALSE | -1.07  | 181.61 | 0.38 | 1 | 464.85303 | 32 | -4        | 4.5  |       | -0.58 | 11    |
| Desogestrel             | FALSE | 5.828  | 20.23  | 0.73 | 0 | 310.473   | 23 | 6.59      | 5.68 |       | 6.59  |       |
| Dexlansoprazole         | FALSE | 2.76   | 66.91  | 0.25 | 3 | 369.36146 | 25 | 2.76      |      |       | 2.6   | 3.64  |
| Diazoxide               | FALSE | 1.196  | 120.31 | 0.12 | 1 | 230.67138 | 14 | 1.05      |      |       | 1.42  | 1.07  |
| Dichlorphenamide        | FALSE | 0.93   | 0.569  | 0    | 1 | 305.15884 | 16 | 0.91      |      |       | 0.24  |       |
| Diclofenac              | FALSE | 4.373  | 49.33  | 0.07 | 2 | 296.14864 | 19 | 0.95      | 4.18 |       | 4.73  | 4.06  |
| Dicumarol               | FALSE | 2.789  | 93.06  | 0.05 | 2 | 336.29497 | 25 | 0.5       | 4.2  |       | 3.66  | 3.55  |
| Didanosine              | FALSE | 0.844  | 88.74  | 0.5  | 1 | 236.22728 | 17 | -1.33     |      |       | -1.65 | -1.33 |
| Diethylcarbamazine      | FALSE | 1.14   | 26.79  | 0.9  | 0 | 199.29324 | 14 | 0.98      |      |       | 1.62  | 6.99  |
| Diffunisal              | FALSE | 3.147  | 57.53  | 0    | 2 | 250.19762 | 18 | 1.29      | 2.94 |       | 4.4   | 4.44  |
| Dimethyl fumarate       | FALSE | 0.62   | 52.6   | 0.49 | 0 | 144.12531 | 10 | 0.62      |      |       | 0.78  |       |
| Diphenhydramine         | FALSE | 2.851  | 0.3    | 0    | 0 | 278.41126 | 21 | 2.2       |      |       | 0.13  | 2.2   |
| Dipyridamole            | FALSE | -1.22  | 145.44 | 0.75 | 2 | 504.62559 | 36 | -1.25     |      |       | 2.93  | 8.78  |
| Dirithromycin           | FALSE | 2.84   | 196.32 | 0.98 | 0 | 835.07372 | 58 | 1.99      |      |       | 2.78  | 8.16  |
| Disopyramide            | FALSE | 2.86   | 59.22  | 0.43 | 2 | 339.47446 | 25 | 0.46      |      |       | 2.58  | 10.1  |
| Dofetilide              | FALSE | 1.679  | 121.57 | 0.37 | 2 | 441.56478 | 29 | 0.7       | 1.99 |       | 8.28  | 1.56  |
| Dolutegravir            | FALSE | -1.31  | 99.18  | 0.3  | 1 | 419.37876 | 30 | -3.97     | 4.5  |       | -0.41 |       |
| Domperidone             | FALSE | 2.453  | 67.92  | 0.36 | 2 | 425.91126 | 30 | 3.38      | 4.27 |       | 9.45  | 4.5   |
| Doxazosin               | FALSE | 2.485  | 112.27 | 0.35 | 3 | 451.47509 | 33 | 0.59      |      |       | 4.04  | 6.45  |
| Doxercalciferol         | FALSE | 8.14   | 40.46  | 0.71 | 0 | 412.64776 | 30 | 8.14      |      |       | 8.16  |       |
| Drospirenone            | FALSE | 3.15   | 6.337  | 0.83 | 0 | 366.49319 | 27 | 3.15      |      |       | 2.84  |       |
| Dydrogesterone          | FALSE | 3.58   | 34.14  | 0.34 | 2 | 312.44581 | 23 | 3.58      |      |       | 3.54  |       |
| Dyphylline              | FALSE | -0.626 | 98.9   | 0.5  | 5 | 254.24256 | 18 | -1.1      |      |       | -1.29 | -1.1  |

|                      |       |        |        |                                                                                                 |   |           |           |       |       |       |       |  |
|----------------------|-------|--------|--------|-------------------------------------------------------------------------------------------------|---|-----------|-----------|-------|-------|-------|-------|--|
| Edoxaban             | FALSE | 136.63 | 164.87 | 7                                                                                               | 3 | 548.0575  | 37        | 1.17  | 0.15  | 6.58  | 1.24  |  |
| 0.89                 |       | 0.5    | 2      | CN1CCC2=C(C1)SC(=N2)C(=O)N[C@@H]3C[C@@H](CC[C@@H]3NC(=O)C(=O)NC4=NC(=CC=C4)C1)C(=O)N(C)C        |   |           |           |       |       |       |       |  |
| Eltrombopag          | FALSE | 111.1  | 111.1  | 7                                                                                               | 3 | 442.46657 | 33        | 1.46  | 3.95  | 3.98  | 4.43  |  |
| 3.777                |       | 0.12   | 2      | CC1=C(C=C(C=C1)N2C(=O)C(=C(N2)C)NN=C3C=CC=C(C3=O)C4=CC(=CC=C4)C(=O)O)C                          |   |           |           |       |       |       |       |  |
| Empagliflozin        | FALSE | 108.61 | 108.61 | 7                                                                                               | 4 | 450.90928 | 31        | 3.38  |       |       | 2.58  |  |
| 3.38                 |       | 1.839  | 2      | C1COC[C@@H]1OC2=CC=C(C=C2)CC3=C(C=CC(=C3)[C@@H]4[C@H]([C@@H]([C@@H]([C@@H]([C@@H]4O)CO)O)O)O)C1 |   |           |           |       |       |       |       |  |
| Emtricitabine        | FALSE | 88.15  | 88.15  | 6                                                                                               | 2 | 247.2467  | 16        | -0.41 |       |       | 1.93  |  |
| -0.41                |       | -0.68  | 0      | FC=1\ C(=N/C(=O)N(C=1)[C@@H]2O[C@@H](SC2)CO)N                                                   |   |           |           |       |       |       |       |  |
| 95.94                | FALSE | 95.94  | 95.94  | 1                                                                                               | 6 | 376.44672 | 27        | -1.15 | 3.15  | 5.43  | 2.43  |  |
| 2.164                |       | 0.55   | 1      | O=C(O)[C@H]2N(C(=O)[C@@H](N[C@@H](C(=O)O)CCC1CCCC1)C)CCC2                                       |   |           |           |       |       |       |       |  |
| Entecavir            | FALSE | 125.76 | 125.76 | 7                                                                                               | 4 | 277.2792  | 20        | -0.96 |       | -2.76 | 3.49  |  |
| -1.404               |       | 0.42   | 1      | O=C2/N=C\C(Nc1nc1c2)[C@@H]3C(=C)[C@@H](CO)[C@@H](O)C3)N                                         |   |           |           |       |       |       |       |  |
| Eplerenone           | FALSE | 82.2   | 82.2   | 6                                                                                               | 0 | 414.49139 | 30        | 1.05  |       | 0.47  | 1.05  |  |
| 2.16                 |       | 0.79   | 0      | COC(=O)[C@H]4C\C1=C\C(=O)CC[C@]1(C)[C@@]65O[C@@H]6C[C@@]3(C)[C@H](CC[C@]23CCC(=O)O2)[C@H]45     |   |           |           |       |       |       |       |  |
| Eprosartan           | FALSE | 92.42  | 120.66 | 5                                                                                               | 2 | 424.51265 | 30        | 1.37  | 3.63  | 4.8   | 8.31  |  |
| 4.604                |       | 0.26   | 3      | O=C(O)\C(=C\C1Cnc1c2ccc(C(=O)O)cc2)CCCCC3CSc3ccc3                                               |   |           |           |       |       |       |       |  |
| Estradiol            | FALSE | 40.46  | 40.46  | 2                                                                                               | 2 | 272.38196 | 20        | 4.13  |       | 3.78  | 4.13  |  |
| 3.838                |       | 0.67   | 1      | C[C@]12CC[C@@H]3c4ccc(cc4CC[C@@H]3[C@@H]1)CC[C@@H]2O)O                                          |   |           |           |       |       |       |       |  |
| Estramustine         | FALSE | 49.77  | 49.77  | 3                                                                                               | 1 | 440.40313 | 29        | 5.35  |       |       | 4.92  |  |
| 5.35                 |       | 5.38   | 0.7    | C1CCN(C(=O)OC1cc3c(cc1)[C@@H]2CC[C@@]4([C@@H](CO)CC[C@H]42CC3)C)CCCC1                           |   |           |           |       |       |       |       |  |
| Ethacrynic acid      | FALSE | 63.6   | 63.6   | 4                                                                                               | 1 | 303.13798 | 19        | -0.33 |       | 2.81  | 3.44  |  |
| 3.36                 |       | 3.964  | 0.23   | C1C1c(C(=O)\C(=O)CC)ccc(OCC(=O)O)C1C1                                                           |   |           |           |       |       |       |       |  |
| Ethambutol           | FALSE | 64.52  | 64.52  | 4                                                                                               | 4 | 204.30976 | 14        | -2.33 |       | 0.12  | 9.59  |  |
| 0.11                 |       | 1      | 0      | CC[C@@H](CO)NCCN[C@@H](CC)CO                                                                    |   |           |           |       |       |       |       |  |
| Ethoxzolamide        | FALSE | 82.28  | 82.28  | 4                                                                                               | 1 | 258.3173  | 16        | 2.04  |       | 2.05  |       |  |
| 2.05                 |       | 1.823  | 0.22   | O=S(=O)(C1nc2ccc(OCC)cc2s1)N                                                                    |   |           |           |       |       |       |       |  |
| Ethylestrenol        | FALSE | 20.23  | 20.23  | 1                                                                                               | 1 | 288.46748 | 21        | 6.51  |       | 6.09  |       |  |
| 6.51                 |       | 4.997  | 0.9    | O[C@]2(CC[C@@H]1[C@@H]4[C@H](CC[C@@]12C)[C@@H]3\C(=C/C3C)CC4)CC                                 |   |           |           |       |       |       |       |  |
| Ethynodiol diacetate | FALSE | 40.46  | 40.46  | 2                                                                                               | 2 | 300.43512 | 22        | 3.92  |       |       | 3.23  |  |
| 3.92                 |       | 4.214  | 0.8    | O[C@@H]4/C=C/3[C@@H]([C@@H]([C@@H]2CC[C@@]1([C@@H](CC[C@]1(C#C)O)[C@@H]2CC3)C)CC4               |   |           |           |       |       |       |       |  |
| Etodolac             | FALSE | 62.32  | 62.32  | 3                                                                                               | 2 | 287.35353 | 21        | 0.61  | 4.31  |       | 3.59  |  |
| 3.723                |       | 0.47   | 2      | O=C(O)CC3(OCCC2c3nc1c(ccc12)CC)CC                                                               |   |           |           |       |       |       |       |  |
| Etoposide            | FALSE | 160.83 | 160.83 | 13                                                                                              | 5 | 588.55657 | 42        | 0.3   |       | 0.03  | 0.3   |  |
| 0.935                |       | 0.55   | 2      |                                                                                                 |   |           |           |       |       |       |       |  |
| Etravirine           | FALSE | 120.63 | 120.63 | 7                                                                                               | 2 | 435.2767  | 28        | 4.19  |       | 5.22  | 4.19  |  |
| 5.492                |       | 0.1    | 3      | N#CC3CC(C(OC1nc(nc1Br)N)NC2ccc(C#N)cc2)C(C)C3                                                   |   |           |           |       |       |       |       |  |
| Ezetimibe            | FALSE | 60.77  | 60.77  | 3                                                                                               | 2 | 409.42524 | 30        | 3.25  |       | 3.96  | 3.26  |  |
| 4.633                |       | 0.21   | 3      | Fc1ccc(cc1)[C@@H](O)CC[C@@H]4C(=O)N(C2ccc(F)cc2)[C@@H]4c3ccc(O)cc3                              |   |           |           |       |       |       |       |  |
| Fenoprofen           | FALSE | 46.53  | 46.53  | 3                                                                                               | 1 | 242.26986 | 18        | 0.75  |       | 4.2   | 3.82  |  |
| 3.517                |       | 0.13   | 2      | O=C(O)C(c2ccc(Oc1cccc1)ccc2)C                                                                   |   |           |           |       |       |       |       |  |
| Fesoterodine         | FALSE | 49.77  | 49.77  | 4                                                                                               | 1 | 411.57687 | 30        | 2.23  |       | 4.36  | 10.6  |  |
| 5.08                 |       | 5.71   | 0.5    | O=C(Oc1ccc(cc1[C@@H](C2Cccccc2)CN(C(C)C)C(C)CO)C(C)C                                            |   |           |           |       |       |       |       |  |
| Fexofenadine         | FALSE | 81     | 81     | 5                                                                                               | 3 | 501.65636 | 37        | 2.3   | 4.43  |       | 1.96  |  |
| 4.8                  |       | 5.642  | 0.41   | O=C(O)C(c1ccc(cc1)C(O)CCN2CCC(CC2)C(O)(C3Ccccc3)c4ccccc4)C(C)C                                  |   |           |           |       |       |       |       |  |
| Flavoxate            | FALSE | 55.84  | 55.84  | 5                                                                                               | 0 | 391.4596  | 29        | 4.32  |       | 4.97  | 5.18  |  |
| 4.494                |       | 0.33   | 2      | O=C(OCCN1CCCC1)c4ccc2c4O/C(=C(\C2=O)C)3CCCC3                                                    |   |           |           |       |       |       |       |  |
| Flecainide           | FALSE | 59.59  | 59.59  | 4                                                                                               | 2 | 414.34271 | 28        | 0.77  |       | 3.66  | 9.69  |  |
| 3.568                |       | 0.59   | 1      | Fc(F)(F)Coc2ccc(C(=O)NCC1NCCC1)C(OCC(F)F)cc2                                                    |   |           |           |       |       |       |       |  |
| Fludarabine          | FALSE | 139.54 | 139.54 | 4                                                                                               | 2 | 285.23178 | 20        | -0.4  |       | -2    | -0.4  |  |
| -1.452               |       | 0.5    | 2      | Fc1nc(C2ncn(C2n1)[C@@H]3O[C@@H]([C@@H](O)[C@@H]3O)CO)N                                          |   |           |           |       |       |       |       |  |
| Fluoxymesterone      | FALSE | 57.53  | 57.53  | 3                                                                                               | 2 | 336.44086 | 24        | 2.17  |       | 2.84  |       |  |
| 2.17                 |       | 2.637  | 0.85   | O=C4\C=C/3[C@]([C@]2(F)[C@@H](O)C[C@]1([C@@H](CC[C@]1(O)C)[C@@H]2CC3)C)C)CC4                    |   |           |           |       |       |       |       |  |
| Fluvastatin          | FALSE | 82.69  | 82.69  | 4                                                                                               | 3 | 411.46594 | 30        | 0.51  | 4.27  |       | 3.62  |  |
| 4.244                |       | 0.29   | 3      | O=C(O)C[C@@H](O)C[C@@H](O)/C=C/c2c(c1ccccc1n2C(C)O)c3ccc(F)cc3                                  |   |           |           |       |       |       |       |  |
| Fosfomycin           | FALSE | 79.87  | 79.87  | 4                                                                                               | 2 | 138.05904 | 8         | -6.79 | 3.02  |       | -2.98 |  |
| 0.318                |       | 0.318  | 1      | C[C@H]1[C@H](O1)P(=O)(O)O                                                                       |   |           |           |       |       |       |       |  |
| Fosinopril           | FALSE | 120.02 | 120.02 | 7                                                                                               | 1 | 563.6625  | 39        | 2.53  | 3.36  | 7.45  | 6.09  |  |
| 6.269                |       | 0.7    | 1      | O=C(CP(=O)(CCCC1CCCC1)OC(=O)CC(C)C)N2C[C@@H](C[C@H]2C(O)O)C3CCCC3                               |   |           |           |       |       |       |       |  |
| Furozolidone         | FALSE | 100.86 | 100.86 | 100.86                                                                                          | 5 | 0         | 225.15828 | 16    | -0.49 |       | -0.04 |  |
| -0.49                |       | 1.1    | 0.25   | [O-][N+](=O)c2oc(C=NN1C(=O)OCC1)cc2                                                             |   |           |           |       |       |       |       |  |
| Furosemide           | FALSE | 122.63 | 131.01 | 5                                                                                               | 3 | 330.74413 | 21        | -0.03 | 3.04  | 1.9   | 3.1   |  |
| 1.403                |       | 0.88   | 2      | O=S(=O)(N)C1C(C1)CC(C(C(=O)O)C1)NCC2OCC2                                                        |   |           |           |       |       |       |       |  |
| Gatifloxacin         | FALSE | 82.11  | 82.11  | 7                                                                                               | 2 | 375.39408 | 27        | -1.11 | 6.27  | 0.24  | 8.72  |  |
| 1.21                 |       | 1.796  | 0.47   | Fc1c(C(OC)c2c(c1)C(=O)C(\C(=O)O)=C/N2C3CC3)N4CC(NCC4)C                                          |   |           |           |       |       |       |       |  |
| Gefitinib            | FALSE | 68.74  | 68.74  | 7                                                                                               | 1 | 446.90236 | 31        | 3.97  |       | 5.6   | 7.34  |  |
| 4.203                |       | 0.36   | 3      | COc1cc2c(cc1OCCN3CCCC3)c(ncn2)Nc4ccc(Cc4)C1F                                                    |   |           |           |       |       |       |       |  |
| Gemifloxacin         | FALSE | 121.35 | 121.35 | 9                                                                                               | 2 | 389.3809  | 28        | -2.09 | 6.02  | -0.86 | 9.15  |  |
| 0.38                 |       | 0.832  | 0.44   | Fc2c(nc1N/C=C/C(=O)O)C(=O)C1C2C3CC3)N4C/C(=N)OC(C4)CN                                           |   |           |           |       |       |       |       |  |
| Glimepiride          | FALSE | 124.68 | 133.06 | 5                                                                                               | 3 | 490.61555 | 34        | 1     | 4.99  | 3.96  | 2.94  |  |
| 4.306                |       | 0.54   | 1      | O=C3C/C=C/C(C)N3C(=O)NCC1ccc(cc1)S(=O)(=O)NC(=O)N[C@@H]2CC[C@@H](C)CC2                          |   |           |           |       |       |       |       |  |
| Glipizide            | FALSE | 130.15 | 138.53 | 6                                                                                               | 3 | 445.53517 | 31        | 0.07  | 4.97  | 2.57  | 2.01  |  |
| 1.902                |       | 0.43   | 2      | O=C(C1ncc(nc1)N)NCC2ccc(cc2)S(=O)(=O)NC(=O)N3CCCC3                                              |   |           |           |       |       |       |       |  |
| Glyburide            | FALSE | 113.6  | 121.98 | 5                                                                                               | 3 | 494.00351 | 33        | 1.82  | 4.99  | 4.24  | 3.75  |  |
| 4.14                 |       | 0.39   | 2      | O=C(NC1CCCC1)NS(=O)(=O)c2ccc(cc2)CCNC(=O)C3cc(C1)ccc3OC                                         |   |           |           |       |       |       |       |  |
| Glycopyrrolate       | FALSE | 46.53  | 46.53  | 46.53                                                                                           | 3 | 318.43052 | 23        | 0.38  |       | 0.12  |       |  |
| 0.38                 |       | 1.457  | 0.63   | C[NH+]1(CCCC1)OC(=O)C(C2CCCC2)(C3=CC=CC=C3)O)C                                                  |   |           |           |       |       |       |       |  |
| Guafenesin           | FALSE | 58.92  | 58.92  | 4                                                                                               | 2 | 198.21576 | 14        | 0.57  |       | 0.1   | 0.57  |  |
| 0.747                |       | 0.4    | 1      | O(C1CCCC1O)CC(O)CO                                                                              |   |           |           |       |       |       |       |  |
| Guanadrel            | FALSE | 82.86  | 82.86  | 5                                                                                               | 2 | 213.27675 | 15        | -1.49 | 0.62  |       | 0.51  |  |
| 0.294                |       | 0.9    | 0      | C1CCC2(CCC1)OCC(=O)2)CN=C(N)N                                                                   |   |           |           |       |       |       |       |  |
| Guanethidine         | FALSE | 67.63  | 67.63  | 67.63                                                                                           | 4 | 2         | 198.30848 | 14    | -1    | 1.34  | 13.35 |  |
| 1.56                 |       | 1.186  | 0.9    | N(=C(N)N)\CN1CCCCC1                                                                             |   |           |           |       |       |       |       |  |
| Hetacillin           | FALSE | 89.95  | 115.25 | 6                                                                                               | 2 | 389.46861 | 27        | -1.31 | 2.45  | 0.81  | 4.97  |  |
| 0.738                |       | 0.53   | 1      | O=C(O)[C@H]3N4C(=O)[C@@H](N2C(=O)C1CCCCC1)NC2(C)C[C@@H]45C3(C)C                                 |   |           |           |       |       |       |       |  |
| Hexocyclium          | FALSE | 23.47  | 23.47  | 2                                                                                               | 1 | 317.48882 | 23        | 1.15  |       | 1.41  | 4.16  |  |
| 2.04                 |       | 0.7    | 1      | C[NH+]1(CCN(CCC1)CC(C2CCCC2)(C3=CC=CC=C3)O)C                                                    |   |           |           |       |       |       |       |  |
| Hydralazine          | FALSE | 63.83  | 63.83  | 4                                                                                               | 2 | 160.17592 | 12        | 0.99  |       | 1.17  | 6.25  |  |
| 0.935                |       | 0      | 2      | n2nc(c1cccc1c2)NN                                                                               |   |           |           |       |       |       |       |  |
| Hydrocortisone       | FALSE | 94.83  | 94.83  | 94.83                                                                                           | 5 | 3         | 362.45989 | 26    | 1.43  |       | 1.89  |  |
| 1.43                 |       | 1.283  | 0.81   | O=C4\C=C/C2/[C@]([C@@H]1[C@@H](O)C[C@@]3([C@@](O)(C(=O)CO)CC[C@H]3[C@@H]1CC2)C)CC4              |   |           |           |       |       |       |       |  |
| Ibandronate          | FALSE | 158.14 | 158.14 | 8                                                                                               | 5 | 319.22894 | 19        | -5.05 | 1.33  | -3.37 | -0.65 |  |
| 0.685                |       | 1      | 0      | O=P(O)(O)C(O)(CCN(CCCCC)P(=O)(O)O                                                               |   |           |           |       |       |       |       |  |
| Ibrutinib            | FALSE | 99.16  | 99.16  | 6                                                                                               | 1 | 440.49706 | 33        | 2.92  |       | 4.07  | 2.92  |  |
| 3.845                |       | 0.2    | 4      | C=CC(=O)N1CCC[C@@H](C1)N2C3=C(C(=N2)C4=CC=C(C=C4)OC5=CC=CC=C5)C(=NC=N3)N                        |   |           |           |       |       |       |       |  |
| Idelalisib           | FALSE | 99.16  | 99.16  | 6                                                                                               | 2 | 415.42302 | 31        | 2.96  |       | 3.62  | 4.08  |  |
| 3.485                |       | 0.14   | 4      | Fc2cccc3\N=C/C(Nc1cccc1)C(=O)c23[C@@H](Nc4ncnc5ncnc45)CC                                        |   |           |           |       |       |       |       |  |
| Imatinib             | FALSE | 86.28  | 86.28  | 7                                                                                               | 2 | 493.60273 | 37        | 2.08  |       | 4.53  | 7.77  |  |
| 4.22                 |       | 0.24   | 4      | Cc1ccc(cc1Nc2nccc(n2)c3ccnc3)NC(=O)C4ccc(cc4)CN5CN(CC5)C                                        |   |           |           |       |       |       |       |  |
| Indapamide           | FALSE | 92.49  | 100.88 | 4                                                                                               | 2 | 365.83453 | 24        | 2.09  |       | 2.96  | 2.1   |  |
| 2.538                |       | 0.19   | 2      | O=S(=O)(N)C1C(C1)CCC(C1)C(=O)NN3C2CCCC2CC3C                                                     |   |           |           |       |       |       |       |  |
| Indinavir            | FALSE | 118.03 | 118.03 | 7                                                                                               | 4 | 613.78948 | 45        | 2.87  |       | 3.68  | 6.62  |  |
| 3.082                |       | 0.47   | 3      | CC(C)C(NC(=O)[C@@H]1CN(CCN1[C@@H](C1[C@@H](CC2CCCC2)C(=O)N[C@@H]3c4ccccc4[C@@H]3O)O)CC5CCCC5    |   |           |           |       |       |       |       |  |
| Irbesartan           | FALSE | 87.13  | 87.13  | 5                                                                                               | 1 | 428.52942 | 32        | 2.53  | 4.5   | 6.04  | 2.6   |  |
| 4.841                |       | 0.4    | 3      | O=C1N(\C(=N/C12CCCC2)CCCC)CC5CCC(C3CCCC3C4nmmn4)CC5                                             |   |           |           |       |       |       |       |  |
| Isoniazid            | FALSE | 68.01  | 68.01  | 68.01                                                                                           | 2 | 137.13928 | 10        | -0.89 |       | -0.67 | 3.79  |  |
| -0.811               |       | 0      | 1      | O=C(NN)C1CCNC1                                                                                  |   |           |           |       |       |       |       |  |
| Isopropamide         | FALSE | 43.09  | 43.09  | 43.09                                                                                           | 1 | 353.52092 | 26        | -3.49 |       | -0.2  |       |  |
| -3.49                |       | 2.785  | 0.43   | O=C(N)C(c1ccc1)(c2ccc2)CC[NH+](C(C)C)C(C)C                                                      |   |           |           |       |       |       |       |  |
| Itraconazole         | FALSE | 100.79 | 100.79 | 100.79                                                                                          | 9 | 0         | 705.63342 | 49    | 4.28  | 7.25  | 6.47  |  |
| 4.35                 |       | 6.435  | 0.37   | O=C1N/C=C/N1c2ccc(cc2)N7CCN(C6CCC(OCC[C@@H]3O[C@]([O]C3)(C4CCC(C1)CC4)CN5nnc5)CC6)CC7)C(C)CC    |   |           |           |       |       |       |       |  |

|                             |          |          |        |                                                                                           |                                                                         |           |           |       |       |       |  |       |
|-----------------------------|----------|----------|--------|-------------------------------------------------------------------------------------------|-------------------------------------------------------------------------|-----------|-----------|-------|-------|-------|--|-------|
| Ivacaftor                   | FALSE    | 78.43    | 78.43  | 4                                                                                         | 3                                                                       | 392.49071 | 29        | 6.34  |       | 3.82  |  | 6.34  |
|                             | 4.516    | 0.33     | 2      | 0=C\2c1c(cccc1)N/C=C/2C(=O)Nc3cc(O)c(cc3C(C)C(C)C(C)C                                     |                                                                         |           |           |       |       |       |  |       |
| Ketoconazole                | FALSE    | 69.06    | 69.06  | 6                                                                                         | 0                                                                       | 531.43092 | 36        | 3.43  |       |       |  | 4.14  |
|                             | 3.55     | 0.38     | 3      | O=C(N5CCN(C4CCC(OC[C@H]10[C@H](OC1)(C2CCC(C1)Cn3ccnc3)cc4)CC5)C                           |                                                                         |           |           |       |       |       |  | 6.88  |
| Ketorolac                   | FALSE    | 59.3     | 59.3   | 3                                                                                         | 1                                                                       | 255.26862 | 19        | -0.94 | 4.29  | 1.62  |  | 2.08  |
|                             | 2.832    | 0.2      | 2      | O=C(c1ccc2n1CCC2C(=O)O)c3ccccc3                                                           |                                                                         |           |           |       |       |       |  |       |
| Labetalol                   | FALSE    | 95.58    | 95.58  | 4                                                                                         | 4                                                                       | 328.40546 | 24        | 0.42  |       | 2.5   |  | 9.37  |
|                             | 2.355    | 0.32     | 2      | O=C(c1cc(ccc1)O)C(O)CNC(C)CCc2cccc2)N                                                     |                                                                         |           |           |       |       |       |  | 2.31  |
| Lactulose                   | FALSE    | 189.52   | 189.52 | 8                                                                                         | 342.29647                                                               | 23        |           | -3.21 |       | -3.59 |  | -3.21 |
|                             | 4.311    | 1        | 0      | O[C@H]2[C@H](O[C@@H]1O[C@H](CO)[C@H](O)[C@H](O)[C@H]1O)[C@H](O)[C@H]2(O)CO)CO             |                                                                         |           |           |       |       |       |  |       |
| Lapatinib                   | FALSE    | 106.35   | 114.73 | 7                                                                                         | 2                                                                       | 581.05754 | 40        | 5.1   |       | 5.96  |  | 6.61  |
|                             | 6.041    | 0.17     | 5      | CS(=O)(=O)CCNc1cccc(o1)c2ccc3c(c2)C(n3)Nc4ccc(c(c4)Cl)OCC5cccc(c5)F                       |                                                                         |           |           |       |       |       |  | 5.14  |
| Lenvatinib                  | FALSE    | 115.57   | 115.57 | 5                                                                                         | 3                                                                       | 426.85295 | 30        | 3.39  |       | 3.35  |  | 4.69  |
|                             | 2.832    | 0.19     | 3      | C4CC4NC(=O)Nc3ccc(cc3Cl)Oc1cnc(cc2OC)c1cc2C(=O)N                                          |                                                                         |           |           |       |       |       |  | 3.39  |
| Levofloxacin                | FALSE    | 73.32    | 73.32  | 7                                                                                         | 1                                                                       | 361.3675  | 26        | -1.41 |       | 5.19  |  | 0     |
|                             | 0.84     | 0.44     | 1      | C[C@H]1COC2C3N1CC(c(C(=O)C3CC(c2N4CCN(CC4)C)F)C(=O)O                                      |                                                                         |           |           |       |       |       |  | 7.37  |
| Linagliptin                 | FALSE    | 113.47   | 113.47 | 7                                                                                         | 1                                                                       | 472.54222 | 35        | -0.34 |       | 2.46  |  | 10.01 |
|                             | 3.243    | 0.4      | 3      | CC#CCN1C2=C(N=C1N3CCC[C@H](C3)N)N(C(=O)N(C2=O)CC4=NC5=CC=CC=C5C(=N4)C)C                   |                                                                         |           |           |       |       |       |  | 1.99  |
| Linezolid                   | FALSE    | 71.11    | 71.11  | 5                                                                                         | 1                                                                       | 337.3461  | 24        | 0.29  |       | 0.67  |  | 5.75  |
|                             | 0.894    | 0.5      | 1      | O=C1O[C@H](CNC(=O)C)N1C3CC(F)C(N2CCOCC2)CC3                                               |                                                                         |           |           |       |       |       |  | 0.3   |
| Lisinopril                  | FALSE    | 132.96   | 132.96 | 7                                                                                         | 4                                                                       | 405.48793 | 29        | -1.82 | 2.18  | -1.82 |  | 10.5  |
|                             | 1.51     | 0.57     | 1      | O=C(O)[C@H]2N(C(=O)[C@H](N[C@H](C(=O)O)CCC1CCCC1)CCCC)CCC2                                |                                                                         |           |           |       |       |       |  | 1.19  |
| Lomitapide                  | FALSE    | 61.44    | 61.44  | 3                                                                                         | 2                                                                       | 693.72039 | 50        | 6.21  |       | 7     |  | 8.56  |
|                             | 7.79     | 0.33     | 4      | FC(F)(F)c5ccc(cc5)-c1ccc(cc1(=O)Nc4CCN(CC4)CCCC2(C(=O)NCC(F)F)F)c3ccccc3-c6ccccc26        |                                                                         |           |           |       |       |       |  | 7.78  |
| Loperamide                  | FALSE    | 43.78    | 43.78  | 3                                                                                         | 1                                                                       | 477.03752 | 34        | 3.73  |       | 4.66  |  | 8.26  |
|                             | 4.635    | 0.34     | 3      | ClC1=CC=C(C2(CCN(CC2)CCC(C3=CC=CC=C3)C(N(C)C)O)C4=CC=CC=C4)O)C=C1                         |                                                                         |           |           |       |       |       |  | 4.26  |
| Lopinavir                   | FALSE    | 120      | 120    | 5                                                                                         | 628.80082                                                               | 46        | 6.26      |       |       | 6.09  |  | 6.26  |
|                             | 4.926    | 0.43     | 3      | O=C(N[C@@H](C1CCCC1)[C@H](O)C[C@@H](NC(=O)[C@H](N2C(=O)NCCC2)C(C)C)CC3CCCC3)COC4C(CCCC4)C |                                                                         |           |           |       |       |       |  |       |
| Loracarbef                  | FALSE    | 112.73   | 112.73 | 5                                                                                         | 3                                                                       | 349.76894 | 24        | -4.38 |       | -0.47 |  | 6.56  |
|                             | 4.00E-03 | 0.31     | 1      | Cl\3=C(C(=O)O)N2C(=O)[C@H](NC(=O)[C@H](C1CCCC1)N)[C@H]2CC3                                |                                                                         |           |           |       |       |       |  | -1.14 |
| Lubiprostone                | FALSE    | 83.83    | 83.83  | 5                                                                                         | 390.46188                                                               | 27        | 0.25      |       | 4.77  | 3.83  |  |       |
|                             | 2.85     | 3.848    | 0.9    | FC(F)(CCCC)[C@]2(O)O[C@H]1CC(=O)[C@H]([C@H]1CC2)CCCCCCC(=O)O                              |                                                                         |           |           |       |       |       |  |       |
| Macitentan                  | FALSE    | 128.22   | 136.6  | 8                                                                                         | 588.2729                                                                | 32        | 3.48      |       | 4.3   |       |  | 5.41  |
|                             | 3.671    | 0.26     | 3      | BrC1CCC(CCl)C3C(Ncnc3OCCO2ncc(Br)cn2)NS(=O)(=O)NCCC                                       |                                                                         |           |           |       |       |       |  |       |
| Medroxyprogesterone acetate | FALSE    | 60.44    | 60.44  | 4                                                                                         | 2                                                                       | 386.52436 | 28        |       | 4.11  |       |  | 4.2   |
|                             | 4.11     | 3.755    | 0.79   | [C@]4[C@@H]3[C@H]([C@H]([C@H]2[C@@H]1(C(=CC(=O)CC1)[C@H](C2)C)CC3)CC4)C(OC(C)=O)C(C)=O    |                                                                         |           |           |       |       |       |  |       |
| Mefenamic acid              | FALSE    | 49.33    | 49.33  | 2                                                                                         | 3                                                                       | 241.28509 | 18        | 2.37  |       | 3.73  |  | 5.29  |
|                             | 5.33     | 3.982    | 0.13   | O=C(O)c2c(Nc1cccc(c1)C)cccc2                                                              |                                                                         |           |           |       |       |       |  |       |
| Meloxicam                   | FALSE    | 99.59    | 136.22 | 5                                                                                         | 351.40071                                                               | 23        | -0.17     | 4.5   | 2.29  | 2.89  |  | 2.71  |
|                             | 0.585    | 0.14     | 2      | CC1cnc(s1)NC(=O)C\3=C(O)C2CCCC2S(=O)(=O)N/3C                                              |                                                                         |           |           |       |       |       |  |       |
| Melphalan                   | FALSE    | 66.55    | 66.55  | 4                                                                                         | 2                                                                       | 305.20022 | 19        | -0.71 | 2.12  | -0.21 |  | 9.54  |
|                             | 2.366    | 0.46     | 1      | c1cc(ccc1[C@@H](C(=O)O)N)N(CCC1)CC1                                                       |                                                                         |           |           |       |       |       |  | 1.79  |
| Meperizolate                | FALSE    | 46.53    | 46.53  | 3                                                                                         | 1                                                                       | 340.43604 | 25        | 0.97  |       | 0.16  |  | 0.97  |
|                             | 1.888    | 0.38     | 2      | Cl=CC=CC=C1C(C(OC2CCC(N+)C(C)C)C2=O)(O)C3=CC=CC=C3                                        |                                                                         |           |           |       |       |       |  |       |
| Mercaptopurine              | FALSE    | 53.07    | 53.07  | 85.16                                                                                     | 4                                                                       | 2         | 152.17705 | 10    | -0.64 |       |  | -1.33 |
|                             | -0.63    | 8.90E-02 | 0      | S=C2/N=C\N1cnc12                                                                          |                                                                         |           |           |       |       |       |  | 8.89  |
| Mesalamine                  | FALSE    | 83.55    | 83.55  | 4                                                                                         | 3                                                                       | 153.13538 | 11        | -2.66 | 1.9   | 1.06  |  | 5.43  |
|                             | 0.471    | 0        | 1      | O=C(O)c1cc(ccc1O)N                                                                        |                                                                         |           |           |       |       |       |  | 0.46  |
| Mesna                       | FALSE    | 57.2     | 104.38 | 4                                                                                         | 1                                                                       | 141.18929 | 7         | -4.7  | 1.5   | -1.55 |  | -1.2  |
|                             | -0.686   | 1        | 0      | [O-]S(=O)(=O)CCS                                                                          |                                                                         |           |           |       |       |       |  |       |
| Metaproterenol              | FALSE    | 72.72    | 72.72  | 4                                                                                         | 4                                                                       | 211.25758 | 15        | -1.77 |       |       |  | 0.08  |
|                             | 0.13     | 1.099    | 0.45   | 1                                                                                         | oc1cc(cc(O)c1)C(O)CNC(C)C                                               |           |           |       |       |       |  | 9.53  |
| Metaxalone                  | FALSE    | 47.56    | 47.56  | 3                                                                                         | 1                                                                       | 221.25239 | 16        | 2.42  |       | 2.15  |  | 2.42  |
|                             | 2.468    | 0.42     | 1      | O=C2OC(COC1CC(CCC1)C)C2                                                                   |                                                                         |           |           |       |       |       |  |       |
| Methanetheline              | FALSE    | 35.53    | 35.53  | 3                                                                                         | 0                                                                       | 340.43604 | 25        | -1.26 |       |       |  | 0.88  |
|                             | -1.26    | 2.426    | 0.38   | CC[N+](C)(C)CCOC(=O)ClC2=CC=CC=C2OC3=CC=CC=C13                                            |                                                                         |           |           |       |       |       |  |       |
| Methazolamide               | FALSE    | 105.19   | 105.19 | 7                                                                                         | 138.87                                                                  | 14        | -0.21     |       | 7.31  |       |  | 0.09  |
|                             | 0.13     | 3.00E-02 | 0      | O=S(=O)(C\1=N\N(C(=N/C(=O)C)/S/1)C)N                                                      |                                                                         |           |           |       |       |       |  |       |
| Methenamine                 | FALSE    | 12.96    | 12.96  | 4                                                                                         | 0                                                                       | 140.18627 | 10        | 2.17  |       | 2.44  |  | 5.28  |
|                             | 8.50E-02 | 1        | 0      | C1N2CN3CN1CN(C2)C3                                                                        |                                                                         |           |           |       |       |       |  | 2.17  |
| Methimazole                 | FALSE    | 15.27    | 47.36  | 1                                                                                         | 1                                                                       | 114.16884 | 7         | -0.34 |       | -0.34 |  | -0.34 |
|                             | -0.305   | 0.25     | 0      | Cn1cc[nH]c1=5                                                                             |                                                                         |           |           |       |       |       |  |       |
| Methscopolamine             | FALSE    | 59.06    | 59.06  | 4                                                                                         | 1                                                                       | 318.38745 | 23        | -2.29 |       | -2.47 |  | -2.47 |
|                             | -2.29    | -0.531   | 0.61   | 1                                                                                         | OC[C@H](c1ccc(O)C(=O)O)[C@H]2C[C@@H]3[N+](C)(C)[C@H](C2)[C@H]4O[C@@H]34 |           |           |       |       |       |  |       |
| Methyltestosterone          | FALSE    | 37.29    | 37.29  | 2                                                                                         | 1                                                                       | 302.45099 | 22        | 4.02  |       | 3.93  |  | 3.93  |
|                             | 4.02     | 3.678    | 0.85   | 0                                                                                         | O=C4C=C3/[C@]([C@H]2CC[C@]1([C@@H](CC[C@@]1(O)C)[C@H]2CC3)C)C)CC4       |           |           |       |       |       |  |       |
| Metolazone                  | FALSE    | 92.5     | 100.88 | 4                                                                                         | 2                                                                       | 365.83454 | 24        | 1.56  |       | 2.06  |  | 1.57  |
|                             | 2.464    | 0.19     | 2      | O=S(=O)(C3C(C1)CC2C(C(=O)N(C1CCCC1)C(N2)C)C3)N                                            |                                                                         |           |           |       |       |       |  |       |
| Metronidazole               | FALSE    | 83.87    | 83.87  | 4                                                                                         | 1                                                                       | 171.15396 | 12        | -0.01 |       | -0.46 |  | 2.58  |
|                             | -0.01    | -0.337   | 0.5    | 1                                                                                         | Cl=C([N](C(=N1)C)CCO)[N+](=O)[O-]                                       |           |           |       |       |       |  |       |
| Metyrosine                  | FALSE    | 83.55    | 83.55  | 4                                                                                         | 3                                                                       | 195.21512 | 14        | -1.78 | 2.29  | -1.67 |  | 9.09  |
|                             | 0.943    | 0.3      | 1      | O=C(O)[C@]([N](CC1CCC(O)CC1)C                                                             |                                                                         |           |           |       |       |       |  | 0.73  |
| Midodrine                   | FALSE    | 93.81    | 93.81  | 5                                                                                         | 3                                                                       | 254.28232 | 18        | -0.84 |       | -0.35 |  | -0.66 |
|                             | -0.548   | 0.42     | 1      | O=C(NCC(O)c1cc(OC)ccc1OC)CN                                                               |                                                                         |           |           |       |       |       |  |       |
| Miglitolo                   | FALSE    | 104.39   | 104.39 | 6                                                                                         | 5                                                                       | 207.22428 | 14        | -1.43 |       | -1.26 |  | -1.4  |
|                             | -2.444   | 1        | 0      | OCCN1[C@H]([C@H](O)[C@H](O)[C@H](O)Cl)CO                                                  |                                                                         |           |           |       |       |       |  |       |
| Miltefosine                 | FALSE    | 68.4     | 68.4   | 4                                                                                         | 0                                                                       | 407.568   | 27        | 4.18  | 1.28  | 3.54  |  | 3.58  |
|                             | 4.866    | 1        | 0      | [O-]P(=O)(OCCCCCCCCCCCC)OCC[N+](C)(C)C                                                    |                                                                         |           |           |       |       |       |  |       |
| Minocycline                 | FALSE    | 164.63   | 164.63 | 9                                                                                         | 5                                                                       | 457.47637 | 33        | -3.33 | 4.5   | 0.21  |  | 11.06 |
|                             | 9.70E-02 | 0.43     | 1      | CN(C)[C@H]1C(\O)=C(\N)O)C(=O)[C@]2(O)C(O)=C3/C(=O)c4c(O)cccc(c4c[C@H]3[C@H]12)N(C)C       |                                                                         |           |           |       |       |       |  | -0.65 |
| Minoxidil                   | FALSE    | 88.94    | 88.94  | 5                                                                                         | 3                                                                       | 209.2483  | 15        | -3.99 |       | -1.41 |  | 16.66 |
|                             | 5.20E-02 | 0.56     | 0      | C2N(C1=NC(=N)N(C=C1)N)O)CCCC2                                                             |                                                                         |           |           |       |       |       |  | -1.49 |
| Mirabegron                  | FALSE    | 100.27   | 128.51 | 5                                                                                         | 4                                                                       | 396.50586 | 28        | -0.37 |       | 1.32  |  | 8.9   |
|                             | 2.453    | 0.24     | 3      | O=C(Nc1ccc(cc1)CCN[C@H](O)c2cccc2)CC3nc(sc3)N                                             |                                                                         |           |           |       |       |       |  | 1.29  |
| Mitotane                    | FALSE    | 0        | 0      | 0                                                                                         | 0                                                                       | 320.0412  | 18        | 5.39  |       | 6.06  |  | 5.39  |
|                             | 5.745    | 0.14     | 2      | Cl1CCCC1C(c2ccc(c1)cc2)C(Cl)Cl                                                            |                                                                         |           |           |       |       |       |  |       |
| Montelukast                 | FALSE    | 70.42    | 95.72  | 5                                                                                         | 2                                                                       | 586.18324 | 41        | 5.19  | 4.76  | 8.47  |  | 2.22  |
|                             | 8.284    | 0.31     | 4      | O=C(O)CC1(CCl)CS[C@H](c2cccc(c2)\C=C\3nc4cc(c1)ccc4cc3)CC5CCCC5C(O)C)C                    |                                                                         |           |           |       |       |       |  | 7.8   |
| Moxifloxacin                | FALSE    | 82.11    | 82.11  | 7                                                                                         | 2                                                                       | 401.43136 | 29        | -0.91 | 6.28  | 0.46  |  | 10.63 |
|                             | 1.6      | 2.003    | 0.52   | 1                                                                                         | COc1c2c(ccc1c3c3[C@@H]4CCN[C@@H]4C3)F)C(=O)c(c2c5c5)C(=O)O              |           |           |       |       |       |  |       |
| Mycophenolic acid           | FALSE    | 93.06    | 93.06  | 6                                                                                         | 2                                                                       | 320.33709 | 23        | 0.26  | 4.71  | 2.29  |  | 2.29  |
|                             | 2.92     | 3.157    | 0.41   | 1                                                                                         | O=C1OCC2c1c(O)c(C(O)C)C(OC)C=C(C)CCC(=O)O                               |           |           |       |       |       |  |       |
| Nabumetone                  | FALSE    | 26.3     | 26.3   | 2                                                                                         | 0                                                                       | 228.28634 | 17        | 2.82  |       | 2.98  |  | 2.82  |
|                             | 2.943    | 0.27     | 2      | O=C(O)CCC1CCC2C(Cl)CCC(O)C2                                                               |                                                                         |           |           |       |       |       |  |       |
| Nadolol                     | FALSE    | 81.95    | 81.95  | 5                                                                                         | 4                                                                       | 309.40058 | 22        | -0.81 |       | 0.38  |  | 9.77  |
|                             | 1.146    | 0.65     | 1      | OC(CNC(C)C)COC1CCC2c1c[C@H](O)[C@H](O)C2                                                  |                                                                         |           |           |       |       |       |  | 1.29  |
| Nalidixic acid              | FALSE    | 70.5     | 70.5   | 5                                                                                         | 1                                                                       | 232.23528 | 17        | -0.37 | 3.45  | 1.02  |  | 6.12  |
|                             | 1.19     | 1.176    | 0.25   | 1                                                                                         | O=C\2c1c(nc(cc1)C)N/C=C/2C(=O)O)CC                                      |           |           |       |       |       |  |       |
| Naproxen                    | FALSE    | 46.53    | 46.53  | 3                                                                                         | 1                                                                       | 230.25915 | 17        | 0.47  | 4.84  | 2.82  |  | 3     |
|                             | 2.849    | 0.21     | 2      | C[C@H](c1ccc2cc(c2c1)O)C(=O)O                                                             |                                                                         |           |           |       |       |       |  |       |
| Nateglinide                 | FALSE    | 66.4     | 66.4   | 3                                                                                         | 2                                                                       | 317.42258 | 23        | 0.61  | 3.61  | 4.3   |  | 4.21  |
|                             | 3.981    | 0.58     | 1      | O=C(N[C@H](CC1CCCC1)C(O)=O)[C@H]2CC[C@H]([C@H]2)C(C)C                                     |                                                                         |           |           |       |       |       |  |       |
| Nelfinavir                  | FALSE    | 101.9    | 127.19 | 6                                                                                         | 4                                                                       | 567.7824  | 40        | 6.96  |       | 5.84  |  | 7.53  |
|                             | 5.285    | 0.56     | 2      | O=C(c1cccc(O)c1)N[C@H](Csc2cccc2)[C@H](O)CN4[C@H](C(=O)NC(C)C)C[C@H]3CCCC[C@H]3C4         |                                                                         |           |           |       |       |       |  | 6.98  |
| Neostigmine                 | FALSE    | 29.54    | 29.54  | 0                                                                                         | 223.29145                                                               | 16        | -3.03     |       | -2.81 |       |  | -3.03 |
|                             | 0.511    | 0.42     | 1      | O=C(Oc1cccc(c1)[N+](C)(C)O)N(C)C                                                          |                                                                         |           |           |       |       |       |  |       |
| Nevirapine                  | FALSE    | 58.12    | 58.12  | 4                                                                                         | 1                                                                       | 266.29786 | 20        | 2.03  |       | 2.65  |  | 4.25  |
|                             | 2.293    | 0.27     | 2      | O=C2Nc1c(ccn1CN(c3cccc23)C4CC4)C                                                          |                                                                         |           |           |       |       |       |  | 2.03  |
| Niacin                      | FALSE    | 50.19    | 50.19  | 3                                                                                         | 1                                                                       | 123.1094  | 9         | -2.93 | 2.2   | 4.8   |  | 0.15  |
|                             | 0.309    | 0        | 1      | OC(=O)Cl=CN=CC=C1                                                                         |                                                                         |           |           |       |       |       |  |       |
| Niclosamide                 | FALSE    | 95.15    | 95.15  | 4                                                                                         | 2                                                                       | 327.11962 | 21        | 5.17  | 7.45  | 0.34  |  | 5.41  |
|                             | 3.595    | 0        | 2      | Clc2cc(ccc2NC(=O)c1cc(c1)ccc1O)[N+][O-]=O                                                 |                                                                         |           |           |       |       |       |  |       |



| O)c5c6o               |       |        |        |       |   |           |    |       |       |  |  |  |  |       |       |  |  |  |  |       |
|-----------------------|-------|--------|--------|-------|---|-----------|----|-------|-------|--|--|--|--|-------|-------|--|--|--|--|-------|
| Riociguat             | FALSE | 138.07 | 138.07 | 8     | 2 | 422.41566 | 31 | -0.31 |       |  |  |  |  | 1.84  | 1.95  |  |  |  |  | -0.31 |
| Risedronate           | FALSE | 167.8  | 167.8  | 8     | 5 | 283.11226 | 17 | -8.31 | 1.1   |  |  |  |  | -2.62 | 5.07  |  |  |  |  | -2.94 |
| Ritodrine             | FALSE | 72.72  | 72.72  | 1     | 4 | 287.35354 | 21 | -0.29 |       |  |  |  |  | 1.65  | 9.31  |  |  |  |  | 1.61  |
| Ritonavir             | FALSE | 2.655  | 202.26 | 7     | 4 | 720.94422 | 50 | 5.28  |       |  |  |  |  | 4.94  | 2.48  |  |  |  |  | 5.28  |
| Rivaroxaban           | FALSE | 145.77 | 116.42 | 2     | 1 | 435.88131 | 29 | 1.84  |       |  |  |  |  | 2.39  |       |  |  |  |  | 1.84  |
| Roflumilast           | FALSE | 60.45  | 60.45  | 4     | 1 | 403.20746 | 26 | 4.83  |       |  |  |  |  | 3     |       |  |  |  |  | 4.83  |
| Rosiglitazone         | FALSE | 71.53  | 71.53  | 6     | 1 | 357.42676 | 25 |       | 1.47  |  |  |  |  | 6.34  | 3.02  |  |  |  |  | 6.5   |
| Rosuvastatin          | FALSE | 140.91 | 140.91 | 2     | 3 | 481.53762 | 33 | -2.71 |       |  |  |  |  | 4.25  | 1.9   |  |  |  |  | 1.9   |
| Ruxolitinib           | FALSE | 83.18  | 83.18  | 4     | 1 | 306.36501 | 23 | 1.69  |       |  |  |  |  | 2.18  | 2.57  |  |  |  |  | 1.69  |
| Sapropterin           | FALSE | 132    | 132    | 8     | 6 | 241.2471  | 17 | -4.95 |       |  |  |  |  | -3.69 | 9.2   |  |  |  |  | -4.22 |
| Saquinavir            | FALSE | 166.75 | 166.75 | 7     | 5 | 670.8408  | 49 | 4.41  |       |  |  |  |  | 4.73  | 7.61  |  |  |  |  | 4.44  |
| Sildenafil            | FALSE | 109.13 | 117.51 | 7     | 1 | 474.57639 | 33 | 2.25  |       |  |  |  |  | 1.98  | 6.03  |  |  |  |  | 2.27  |
| Sildenafil            | FALSE | 2.247  | 0.5    | 2     | 1 | 495.53448 | 35 | 1.05  |       |  |  |  |  | 2.97  | 8.93  |  |  |  |  | 2.97  |
| Sildenafil            | FALSE | 97.05  | 97.05  | 6     | 3 | 495.53448 | 35 | 1.05  |       |  |  |  |  | 2.97  | 8.93  |  |  |  |  | 2.97  |
| Sildenafil            | FALSE | 3.451  | 0.98   | 2     | 2 | 749.93908 | 52 | 3.05  |       |  |  |  |  | 4.47  | 3.01  |  |  |  |  | 4.99  |
| Simeprevir            | FALSE | 156.88 | 193.5  | 9     | 2 | 749.93908 | 52 | 3.05  |       |  |  |  |  | 4.47  | 3.01  |  |  |  |  | 4.99  |
| Sitagliptin           | FALSE | 77.04  | 77.04  | 4     | 1 | 407.31361 | 28 | 1.21  |       |  |  |  |  | 0.69  | 7.21  |  |  |  |  | 1.3   |
| Sodium phenylbutyrate | FALSE | 40.12  | 40.12  | 1     | 2 | 163.19314 | 12 | -0.19 |       |  |  |  |  | 4.76  | 2.28  |  |  |  |  |       |
| Sofosbuvir            | FALSE | 162.53 | 162.53 | 9     | 3 | 529.45252 | 36 | 1.61  |       |  |  |  |  | 0.84  |       |  |  |  |  | 1.62  |
| Sotalol               | FALSE | 78.43  | 86.81  | 4     | 3 | 272.3638  | 18 | -1.6  |       |  |  |  |  | 0.23  | 0.32  |  |  |  |  | 0.32  |
| Sparfloxacin          | FALSE | 98.9   | 98.9   | 7     | 3 | 392.39978 | 28 | -0.54 |       |  |  |  |  | 6.26  | -0.1  |  |  |  |  | 8.59  |
| Spirapril             | FALSE | 95.94  | 146.54 | 8     | 2 | 466.61399 | 31 | -0.48 |       |  |  |  |  | 2.99  | 1.05  |  |  |  |  | 3.16  |
| Spirolactone          | FALSE | 60.44  | 60.44  | 5     | 0 | 416.57347 | 29 | 3.12  |       |  |  |  |  | 2.84  |       |  |  |  |  | 2.84  |
| Stanozolol            | FALSE | 48.91  | 48.91  | 2     | 3 | 328.49157 | 24 | 5.53  |       |  |  |  |  | 4.56  | 3.86  |  |  |  |  | 5.53  |
| Stavudine             | FALSE | 78.87  | 78.87  | 4     | 2 | 224.21328 | 16 | -0.86 |       |  |  |  |  | -0.49 | -0.86 |  |  |  |  | -0.86 |
| Succimer              | FALSE | 74.59  | 152.19 | 6     | 4 | 182.21804 | 10 | -2.82 | 2.74  |  |  |  |  | -1.48 |       |  |  |  |  | 1.93  |
| Sulfacytine           | FALSE | 104.86 | 113.24 | 5     | 2 | 294.32955 | 20 | -2.49 | 2.78  |  |  |  |  | -0.33 | -0.49 |  |  |  |  | -0.49 |
| Sulfadoxine           | FALSE | 116.43 | 124.8  | 7     | 2 | 310.32896 | 21 | -1.49 | 6.16  |  |  |  |  | 1.23  | 0.34  |  |  |  |  | 0.34  |
| Sulfadoxine           | FALSE | 0.837  | 0.17   | 2     | 2 | 280.30298 | 19 | -0.48 | 6.69  |  |  |  |  | 0.65  | 0.42  |  |  |  |  | 0.42  |
| Sulfamerazine         | FALSE | 107.2  | 115.58 | 2     | 2 | 280.30298 | 19 | -0.48 | 6.69  |  |  |  |  | 0.65  | 0.42  |  |  |  |  | 0.42  |
| Sulfamerazine         | FALSE | 0.297  | 0.09   | 2     | 2 | 280.30298 | 19 | -0.48 | 6.69  |  |  |  |  | 0.65  | 0.42  |  |  |  |  | 0.42  |
| Sulfamethizole        | FALSE | 97.97  | 97.97  | 5     | 2 | 270.3313  | 17 | -1.17 | 5.51  |  |  |  |  | 0.42  |       |  |  |  |  | 0.42  |
| Sulfamethoxazole      | FALSE | 98.22  | 98.22  | 4     | 2 | 253.27763 | 17 | -0.32 | 5.81  |  |  |  |  | 0.56  |       |  |  |  |  | 0.56  |
| Sulfamethoxazole      | FALSE | 0.89   | 0.709  | 2     | 2 | 253.27763 | 17 | -0.32 | 5.81  |  |  |  |  | 0.56  |       |  |  |  |  | 0.56  |
| Sulfaphenazole        | FALSE | 90.01  | 90.01  | 4     | 2 | 314.36226 | 22 | 0.98  | 6.47  |  |  |  |  | 2.07  |       |  |  |  |  | 2.07  |
| Sulfasalazine         | FALSE | 141.31 | 141.31 | 8     | 3 | 398.39255 | 28 | 0.03  | 2.88  |  |  |  |  | 3.88  |       |  |  |  |  | 3.88  |
| Sulfasalazine         | FALSE | 3.18   | 3.463  | 0     | 3 | 398.39255 | 28 | 0.03  | 2.88  |  |  |  |  | 3.88  |       |  |  |  |  | 3.88  |
| Sulfapyridine         | FALSE | 76.9   | 76.9   | 3     | 0 | 404.4815  | 29 | -0.2  | 5.44  |  |  |  |  | 1.66  |       |  |  |  |  | 1.66  |
| Sulfonamide           | FALSE | 132.79 | 179.59 | 8     | 4 | 404.4815  | 29 | -0.2  | 5.44  |  |  |  |  | 1.66  |       |  |  |  |  | 1.66  |
| Sulfonamide           | FALSE | 1.132  | 0.14   | 2     | 2 | 404.4815  | 29 | -0.2  | 5.44  |  |  |  |  | 1.66  |       |  |  |  |  | 1.66  |
| Sumatriptan           | FALSE | 65.2   | 73.58  | 3     | 2 | 295.40043 | 20 | -1.21 | 0.74  |  |  |  |  | 9.49  | 0.67  |  |  |  |  | 0.67  |
| Sunitinib             | FALSE | 77.23  | 77.23  | 3     | 3 | 398.47378 | 29 | 1.33  | 3     |  |  |  |  | 9.78  | 3.15  |  |  |  |  | 3.15  |
| Sunitinib             | FALSE | 2.997  | 0.36   | 2     | 2 | 398.47378 | 29 | 1.33  | 3     |  |  |  |  | 9.78  | 3.15  |  |  |  |  | 3.15  |
| Tamsulosin            | FALSE | 98.88  | 108.26 | 6     | 2 | 408.51172 | 28 | 0.86  | 2.17  |  |  |  |  | 9.03  | 2.24  |  |  |  |  | 2.24  |
| Tamsulosin            | FALSE | 2.719  | 0.4    | 2     | 2 | 408.51172 | 28 | 0.86  | 2.17  |  |  |  |  | 9.03  | 2.24  |  |  |  |  | 2.24  |
| Tedizolid             | FALSE | 106.26 | 106.26 | 7     | 1 | 370.3378  | 27 | 1.56  | 1.28  |  |  |  |  | 1.56  |       |  |  |  |  | 1.56  |
| Tedizolid             | FALSE | 1.784  | 0.24   | 3     | 1 | 370.3378  | 27 | 1.56  | 1.28  |  |  |  |  | 1.56  |       |  |  |  |  | 1.56  |
| Tegaserod             | FALSE | 85.29  | 85.29  | 3     | 4 | 301.38671 | 22 | 2.41  | 2.81  |  |  |  |  | 9.65  | 2.91  |  |  |  |  | 2.91  |
| Tegaserod             | FALSE | 3.131  | 0.38   | 2     | 2 | 301.38671 | 22 | 2.41  | 2.81  |  |  |  |  | 9.65  | 2.91  |  |  |  |  | 2.91  |
| Telaprevir            | FALSE | 179.56 | 179.56 | 8     | 4 | 679.84932 | 49 | 3.93  | 5.35  |  |  |  |  | 3.93  |       |  |  |  |  | 3.93  |
| Telaprevir            | FALSE | 2.685  | 0.72   | 1     | 1 | 679.84932 | 49 | 3.93  | 5.35  |  |  |  |  | 3.93  |       |  |  |  |  | 3.93  |
| Telithromycin         | FALSE | 171.85 | 171.85 | 13    | 1 | 812.0037  | 58 | 3.79  | 3.75  |  |  |  |  | 8.13  | 8.13  |  |  |  |  | 8.13  |
| Tenofovir             | FALSE | 146.19 | 146.19 | 8     | 3 | 287.21232 | 19 | -5.63 | 2.09  |  |  |  |  | -1.56 | 4.36  |  |  |  |  | -1.71 |
| Tenofovir             | FALSE | -0.911 | 0.44   | 2     | 2 | 287.21232 | 19 | -5.63 | 2.09  |  |  |  |  | -1.56 | 4.36  |  |  |  |  | -1.71 |
| Testolactone          | FALSE | 43.37  | 43.37  | 0     | 3 | 300.39206 | 22 | 2.52  | 2.63  |  |  |  |  | 2.63  |       |  |  |  |  | 2.63  |
| Thiabendazole         | FALSE | 41.57  | 41.57  | 69.81 | 2 | 201.24768 | 14 | 2.47  | 2.47  |  |  |  |  | 2.36  | 3.58  |  |  |  |  | 3.58  |
| Thioguanine           | FALSE | 79.09  | 111.18 | 5     | 3 | 167.1917  | 11 | -0.16 | -1.88 |  |  |  |  | 11.12 | -0.16 |  |  |  |  | -0.16 |
| Ticagrelor            | FALSE | 138.44 | 163.74 | 10    | 4 | 522.56802 | 36 | 1.9   | 2.55  |  |  |  |  | 3.12  | 1.9   |  |  |  |  | 3.12  |
| Ticagrelor            | FALSE | 2.703  | 0.57   | 3     | 3 | 522.56802 | 36 | 1.9   | 2.55  |  |  |  |  | 3.12  | 1.9   |  |  |  |  | 3.12  |
| Ticlopidine           | FALSE | 3.24   | 31.47  | 1     | 0 | 263.78566 | 17 | 3.6   | 3.77  |  |  |  |  | 7.1   | 3.77  |  |  |  |  | 3.77  |
| Ticlopidine           | FALSE | 3.665  | 0.29   | 2     | 2 | 263.78566 | 17 | 3.6   | 3.77  |  |  |  |  | 7.1   | 3.77  |  |  |  |  | 3.77  |
| Tiludronate           | FALSE | 134.68 | 159.97 | 7     | 4 | 318.60828 | 17 | -5.75 | 0.83  |  |  |  |  | 0.26  | -0.32 |  |  |  |  | -0.32 |
| Tiludronate           | FALSE | 2.281  | 0.14   | 1     | 1 | 318.60828 | 17 | -5.75 | 0.83  |  |  |  |  | 0.26  | -0.32 |  |  |  |  | -0.32 |
| Trinidazole           | FALSE | 97.78  | 106.16 | 5     | 0 | 247.27152 | 16 | -0.27 | -0.32 |  |  |  |  | 2.3   | -0.27 |  |  |  |  | -0.27 |
| Trinidazole           | FALSE | 0.149  | 0.62   | 1     | 1 | 247.27152 | 16 | -0.27 | -0.32 |  |  |  |  | 2.3   | -0.27 |  |  |  |  | -0.27 |
| Tiopronin             | FALSE | 66.4   | 105.19 | 4     | 3 | 163.19485 | 10 | -4.01 | -0.23 |  |  |  |  | -0.23 | -0.33 |  |  |  |  | -0.33 |
| Tiopronin             | FALSE | -0.362 | 0.6    | 0     | 0 | 163.19485 | 10 | -4.01 | -0.23 |  |  |  |  | -0.23 | -0.33 |  |  |  |  | -0.33 |
| Tipranavir            | FALSE | 105.58 | 113.96 | 6     | 2 | 602.66432 | 42 | 3.19  | 4.5   |  |  |  |  | 7.76  | 7.21  |  |  |  |  | 7.21  |
| Tipranavir            | FALSE | 6.948  | 0.35   | 3     | 3 | 602.66432 | 42 | 3.19  | 4.5   |  |  |  |  | 7.76  | 7.21  |  |  |  |  | 7.21  |
| Tofacitinib           | FALSE | 88.91  | 88.91  | 5     | 1 | 312.3696  | 23 | -1.01 | 6.04  |  |  |  |  | 1.52  | 6.78  |  |  |  |  | 6.78  |
| Tofacitinib           | FALSE | 1.372  | 0.5    | 2     | 2 | 312.3696  | 23 | -1.01 | 6.04  |  |  |  |  | 1.52  | 6.78  |  |  |  |  | 6.78  |



|                      |                                                                                                               |        |        |                                                                      |                                                                                         |           |    |       |       |       |       |
|----------------------|---------------------------------------------------------------------------------------------------------------|--------|--------|----------------------------------------------------------------------|-----------------------------------------------------------------------------------------|-----------|----|-------|-------|-------|-------|
| Biperiden            | TRUE                                                                                                          | 23.47  | 23.47  | 2                                                                    | 1                                                                                       | 311.46106 | 23 | 2.17  | 4.94  | 9.58  | 4.01  |
|                      | 3.648                                                                                                         | 0.62   | 1      | OC(c1cccc1)(CCN2CCCC2)C4C3(C=C/C(C)3)C4                              |                                                                                         |           |    |       |       |       |       |
| Bromazepam           | TRUE                                                                                                          | 54.35  | 54.35  | 3                                                                    | 1                                                                                       | 316.1527  | 19 | 1.65  | 1.7   | 2     | 1.65  |
|                      | 2.327                                                                                                         | 0.07   | 2      | BrC1=CC2=C(C=C1)NC(CN=C2C3=CC=CC=N3)=O                               |                                                                                         |           |    |       |       |       |       |
| Bromocriptine        | TRUE                                                                                                          | 118.21 | 118.21 | 6                                                                    | 3                                                                                       | 654.5945  | 43 | 5.08  |       | 6.58  | 6.72  |
|                      | 5.15                                                                                                          | 4.363  | 0.59   |                                                                      |                                                                                         |           |    |       |       |       |       |
|                      | BrC1=C(C[C@H]2N(C)C3)C4=C(C=C=C4C2=C([C@H]3C(N[C@]5(C(C)C)O[C@]6(N([C@@H](CC(C)C)C(N7CCC[C@H]76)=O)C5=O)=O)N1 |        |        |                                                                      |                                                                                         |           |    |       |       |       |       |
| Bromodiphenhydramine | TRUE                                                                                                          | 12.47  | 12.47  | 2                                                                    | 0                                                                                       | 334.2508  | 20 | 3.11  |       | 4.32  | 8.71  |
|                      | 4.43                                                                                                          | 4.133  | 0.29   | 2                                                                    | BrC1CCC(Cc1)C(OCCN(C)C)C2CCCC2                                                          |           |    |       |       |       |       |
| Brompheniramine      | TRUE                                                                                                          | 16.13  | 16.13  | 2                                                                    | 0                                                                                       | 319.23946 | 19 | 1.63  |       | 3.3   | 9.33  |
|                      | 3.56                                                                                                          | 3.78   | 0.31   | 2                                                                    | BrC1CCC(Cc1)C(C2NCCCC2)CCN(C)C                                                          |           |    |       |       |       |       |
| Buclicline           | TRUE                                                                                                          | 6.48   | 6.48   | 2                                                                    | 0                                                                                       | 433.02801 | 31 | 6.11  | 8.06  | 6.98  | 6.22  |
|                      | 7.121                                                                                                         | 0.36   | 3      | ClC1CCC(Cc1)C(C2CCCC2)N3CCN(CC3)CC4CC(Cc4)C(C)(C)C                   |                                                                                         |           |    |       |       |       |       |
| Budipine             | TRUE                                                                                                          | 3.24   | 3.24   | 1                                                                    | 0                                                                                       | 293.44577 | 22 | 1.91  | 5.58  | 9.92  | 4.64  |
|                      | 4.691                                                                                                         | 0.43   | 2      | Cl(CCCCC1)C3(C2CCCC2)CCN(C(C)(C)C)C3                                 |                                                                                         |           |    |       |       |       |       |
| Bumetanide           | TRUE                                                                                                          | 118.72 | 127.1  | 6                                                                    | 3                                                                                       | 364.4161  | 25 | -0.19 | 3.18  | 3.37  | 2.78  |
|                      | 2.862                                                                                                         | 0.24   | 2      | O=S(=O)(C2CC(CCC(NCCCC)C2O1CCCC1)C(=O)O)N                            |                                                                                         |           |    |       |       |       |       |
| Buprenorphine        | TRUE                                                                                                          | 62.16  | 62.16  | 5                                                                    | 2                                                                                       | 467.64013 | 34 | 2.46  | 3.99  | 8.31  | 3.99  |
|                      | 3.44                                                                                                          | 3.923  | 0.79   | 1                                                                    | OC7CC5C1C7O[C@H]3[C@]6(OC[C@H](CC[C@@]2([C@H](N(CC[C@]123)CC4CC4)C5)CC6)[O](O)C(C)C(C)C |           |    |       |       |       |       |
| Bupropion            | TRUE                                                                                                          | 29.1   | 29.1   | 2                                                                    | 1                                                                                       | 239.74112 | 16 | 3.27  | 3.21  | 7.16  | 3.47  |
|                      | 3.12                                                                                                          | 0.46   | 1      | O=C(C(C)N(C)C(C)C)C1=CC=CC=C1                                        |                                                                                         |           |    |       |       |       |       |
| Buspirone            | TRUE                                                                                                          | 69.64  | 69.64  | 6                                                                    | 0                                                                                       | 385.50313 | 28 | 3.08  | 2.69  | 7.01  | 3.43  |
|                      | 2.545                                                                                                         | 0.71   | 1      | O=C1N(CCCCN2CCN(CC2)C3=NC=CC=N3)C(CCC4(CCCC4)C1)=O                   |                                                                                         |           |    |       |       |       |       |
| Butabarbital         | TRUE                                                                                                          | 75.27  | 75.27  | 3                                                                    | 2                                                                                       | 212.24564 | 15 | 1.41  | 7.71  | 1.58  |       |
|                      | 1.52                                                                                                          | 1.841  | 0.7    | 0                                                                    | O=C1NC(=O)NC(=O)C1(C(C)C)CC                                                             |           |    |       |       |       |       |
| Cabergoline          | TRUE                                                                                                          | 71.67  | 71.67  | 4                                                                    | 2                                                                                       | 451.60427 | 33 | 0.55  | 4.17  | 9.41  | 2.43  |
|                      | 3.56                                                                                                          | 0.54   | 2      | O=C(NCC)N(C(=O)[C@H]2[C@]3(Cc4CCCC1c4(Cc1)C[C@H]3N(C2)C)\C=C)CCN(C)C |                                                                                         |           |    |       |       |       |       |
| Caffeine             | TRUE                                                                                                          | 58.44  | 58.44  | 3                                                                    | 0                                                                                       | 194.19059 | 14 | -0.13 | -0.04 |       | -0.13 |
|                      | 0.424                                                                                                         | 0.38   | 1      | CN1C=NC2=C1C(=O)N(C(C)O)N2O                                          |                                                                                         |           |    |       |       |       |       |
| Carbamazepine        | TRUE                                                                                                          | 46.33  | 46.33  | 1                                                                    | 1                                                                                       | 236.26858 | 18 | 2.67  |       | 2.38  |       |
|                      | 2.67                                                                                                          | 2.679  | 0      | 2                                                                    | C1CCC2C(C1)C=C3CCCC3N2C(=O)N                                                            |           |    |       |       |       |       |
| Carbinoxamine        | TRUE                                                                                                          | 25.36  | 25.36  | 3                                                                    | 0                                                                                       | 290.78786 | 20 | 1.5   | 2.67  |       | 8.65  |
|                      | 2.76                                                                                                          | 3.2    | 0.31   | 2                                                                    | ClC1CCC(Cc1)C(OCCN(C)C)C2NCCC2                                                          |           |    |       |       |       |       |
| Carisoprodol         | TRUE                                                                                                          | 90.65  | 90.65  | 4                                                                    | 0                                                                                       | 260.32996 | 18 | 2.15  | 2.34  |       |       |
|                      | 2.15                                                                                                          | 2.199  | 0.83   | 0                                                                    | O=C(OCC(COC(=O)NC(C)C)C)CCN                                                             |           |    |       |       |       |       |
| Carvedilol           | TRUE                                                                                                          | 75.74  | 75.74  | 5                                                                    | 3                                                                                       | 406.47424 | 30 | 3.1   | 4.04  | 8.38  | 4.12  |
|                      | 4.014                                                                                                         | 0.25   | 4      | O(C4CCCC4OCCN(C)O)C3C(CCC2C3C1C(CCCC1)N2)C                           |                                                                                         |           |    |       |       |       |       |
| Cevimeline           | TRUE                                                                                                          | 12.47  | 37.77  | 3                                                                    | 0                                                                                       | 199.31308 | 13 | -0.84 | 1.14  | 9.51  | 1.23  |
|                      | 1.035                                                                                                         | 1      | 0      | O1[C@H](SC[C@@]12CN3CCC2CC3)C                                        |                                                                                         |           |    |       |       |       |       |
| Chlorthediano        | TRUE                                                                                                          | 23.47  | 23.47  | 2                                                                    | 1                                                                                       | 289.7998  | 20 | 2.16  | 3.63  | 9.43  |       |
|                      | 3.81                                                                                                          | 3.559  | 0.29   | 2                                                                    | ClC1CCCC1C(O)(C2CCCC2)CCN(C)C                                                           |           |    |       |       |       |       |
| Chloramphenicol      | TRUE                                                                                                          | 115.38 | 115.38 | 5                                                                    | 3                                                                                       | 323.12937 | 20 | 1.02  | 1.28  |       |       |
|                      | 1.02                                                                                                          | 1.025  | 0.36   | 1                                                                    | C1CC(Cc1)[C@H]([C@H](CO)NC(=O)C(C1)O)[N+](=O)[O-]                                       |           |    |       |       |       |       |
| Chlordiazepoxide     | TRUE                                                                                                          | 53.14  | 53.14  | 3                                                                    | 1                                                                                       | 299.75486 | 21 | 2.16  | 3.79  | 2.38  |       |
|                      | 2.16                                                                                                          | 2.297  | 0.12   | 2                                                                    | ClC1=CC2=C(N=C(NC)N+)([O-])=C2C3=CC=CC=C3)C=C1                                          |           |    |       |       |       |       |
| Chlormezanone        | TRUE                                                                                                          | 54.45  | 54.45  | 3                                                                    | 0                                                                                       | 273.73587 | 17 | 0.86  | 1.57  |       |       |
|                      | 0.86                                                                                                          | 1.559  | 0.36   | 1                                                                    | O=S1(CCC(N(C)C)C1C2=CC=C(C=C2)C1)=O                                                     |           |    |       |       |       |       |
| Chlorphentermine     | TRUE                                                                                                          | 26.02  | 26.02  | 1                                                                    | 1                                                                                       | 183.67786 | 12 | 0.46  | 2.85  | 9.76  |       |
|                      | 2.75                                                                                                          | 2.503  | 0.4    | 1                                                                    | ClC1CCC(Cc1)CC(N)C                                                                      |           |    |       |       |       |       |
| Chlorpromazine       | TRUE                                                                                                          | 6.48   | 31.78  | 3                                                                    | 0                                                                                       | 318.86415 | 21 | 3.26  | 5.3   | 9.41  |       |
|                      | 5.2                                                                                                           | 4.739  | 0.29   | 2                                                                    | CN(C)CCN1C2CCCC2S3C1CC(C3)C1                                                            |           |    |       |       |       |       |
| Chlorprothixene      | TRUE                                                                                                          | 3.24   | 28.54  | 2                                                                    | 0                                                                                       | 315.86021 | 21 | 4.41  | 5.48  | 9.05  |       |
|                      | 6.05                                                                                                          | 5.124  | 0.22   | 2                                                                    | ClC2CC1C(\C3C(S1CC2)CCCC3)=C/C(C)C                                                      |           |    |       |       |       |       |
| Chlorzoxazone        | TRUE                                                                                                          | 38.33  | 38.33  | 2                                                                    | 1                                                                                       | 169.56515 | 11 | 2.15  | 1.87  |       |       |
|                      | 2.19                                                                                                          | 2.004  | 0      | 1                                                                    | ClC2CC1C(OCC(=O)N1)CC2                                                                  |           |    |       |       |       |       |
| Cilostazol           | TRUE                                                                                                          | 81.93  | 81.93  | 5                                                                    | 1                                                                                       | 369.46067 | 27 | 3.05  | 3.53  | 2.19  | 3.05  |
|                      | 3.579                                                                                                         | 0.6    | 0.6    | O=C4NC3C(CC(OCCCC1Nmm1)C2CCCC2)C3)CC4                                |                                                                                         |           |    |       |       |       |       |
| Cinacalcet           | TRUE                                                                                                          | 12.03  | 12.03  | 1                                                                    | 1                                                                                       | 357.41198 | 26 | 3.96  | 6.35  | 9.19  | 5.74  |
|                      | 5.956                                                                                                         | 0.27   | 3      | FC(F)ClCCC(C1)CCCN[C@H](C32CCCC2CCC)C                                |                                                                                         |           |    |       |       |       |       |
| Citalopram           | TRUE                                                                                                          | 36.26  | 36.26  | 3                                                                    | 0                                                                                       | 324.39194 | 24 | 0.39  | 3.13  | 9.57  | 2.51  |
|                      | 3.721                                                                                                         | 0.35   | 2      | FC1CCC(Cc1)C3(OCC2CC(C#N)CC23)CCN(C)C                                |                                                                                         |           |    |       |       |       |       |
| Clemastine           | TRUE                                                                                                          | 12.47  | 12.47  | 2                                                                    | 0                                                                                       | 343.89024 | 24 | 3.04  | 5.45  | 10.23 | 5.69  |
|                      | 4.806                                                                                                         | 0.43   | 2      | ClC1CCC(Cc1)[O](OCC[C@H]2N(C)CC2)(C3CCCC3)C                          |                                                                                         |           |    |       |       |       |       |
| Clidinium            | TRUE                                                                                                          | 46.53  | 46.53  | 3                                                                    | 1                                                                                       | 352.44674 | 26 | 0.83  | -0.05 | 0.83  |       |
|                      | 1.795                                                                                                         | 0.41   | 2      | O=C(OCC2CC1CC[N+](CC1)(C)C2)C(O)(C3CCCC3)C4CCCC4                     |                                                                                         |           |    |       |       |       |       |
| Clobazam             | TRUE                                                                                                          | 40.62  | 40.62  | 2                                                                    | 0                                                                                       | 300.73962 | 21 | 1.67  | 2.44  | 1.69  |       |
|                      | 2.738                                                                                                         | 0.12   | 2      | ClC1=CC(N(C2=C(C=CC2)C(C(N3C)=O)=O)C3=C=C1                           |                                                                                         |           |    |       |       |       |       |
| Clomipramine         | TRUE                                                                                                          | 6.48   | 6.48   | 2                                                                    | 0                                                                                       | 314.85232 | 22 | 3.41  | 5.92  | 9.46  |       |
|                      | 5.39                                                                                                          | 5.052  | 0.37   | 2                                                                    | ClC1=CC(N(CCCN(C)C)C2=C(C(C)C)C=C2)C=C3=C=C1                                            |           |    |       |       |       |       |
| Clonazepam           | TRUE                                                                                                          | 87.28  | 87.28  | 4                                                                    | 1                                                                                       | 315.71119 | 22 | 2.34  | 2.38  | 2.34  |       |
|                      | 2.859                                                                                                         | 0.07   | 2      | [O-][N+](C1=CC2=C(C=C1)NC(CN=C2C3=CC=CC=C3)C1)=O                     |                                                                                         |           |    |       |       |       |       |
| Clozapine            | TRUE                                                                                                          | 30.86  | 30.86  | 4                                                                    | 1                                                                                       | 326.82326 | 23 | 1.96  | 3.71  | 7.14  | 2.36  |
|                      | 3.422                                                                                                         | 0.28   | 2      | CN1CCN(C1)C2=NC3CC(CCC3NC4C2CCCC4)C1                                 |                                                                                         |           |    |       |       |       |       |
| Cycloserine          | TRUE                                                                                                          | 64.34  | 64.34  | 3                                                                    | 2                                                                                       | 102.09194 | 7  | -1.85 | -1.19 | 5.93  | -1.84 |
|                      | -1.788                                                                                                        | 0.67   | 0      | O=C1NOC[C@H]1N                                                       |                                                                                         |           |    |       |       |       |       |
| Danazol              | TRUE                                                                                                          | 46.26  | 46.26  | 2                                                                    | 1                                                                                       | 337.45527 | 25 | 4.7   | 3.93  | 4.7   |       |
|                      | 4.874                                                                                                         | 0.68   | 1      | C#C[C@]5(O)CC[C@H]4[C@H]3[C@H]([C@@]2(/C(=C\C1Onc1C2)CC3)C)CC[C@]45C |                                                                                         |           |    |       |       |       |       |
| Dapsone              | TRUE                                                                                                          | 86.18  | 94.56  | 4                                                                    | 2                                                                                       | 248.30088 | 17 | 0.94  | 0.89  | 0.94  |       |
|                      | 1.439                                                                                                         | 0      | 2      | O=S(=O)(ClCCC(N)C)C2CCCC2                                            |                                                                                         |           |    |       |       |       |       |
| Dasatinib            | TRUE                                                                                                          | 106.51 | 134.75 | 8                                                                    | 3                                                                                       | 488.00553 | 33 | 1.84  | 3.03  | 6.59  | 2.25  |
|                      | 3.769                                                                                                         | 0.36   | 3      | CC1CCCC(C1NC(=O)C2=NC(=O)C3=CC(=O)N4CCN(C4)CCO)C1                    |                                                                                         |           |    |       |       |       |       |
| Desloratadine        | FALSE                                                                                                         | 24.92  | 24.92  | 2                                                                    | 1                                                                                       | 310.82056 | 22 | 4.11  | 3.83  | 10.27 |       |
|                      | 6.77                                                                                                          | 4.213  | 0.32   | 2                                                                    | ClC4CC2(C(C/C1NCCC1CC2)=C3)CCN(C)C                                                      |           |    |       |       |       |       |
| Desvenlafaxine       | TRUE                                                                                                          | 43.7   | 43.7   | 3                                                                    | 2                                                                                       | 263.3752  | 19 | 0.52  | 2.68  | 9.33  |       |
|                      | 2.26                                                                                                          | 2.796  | 0.62   | 1                                                                    | OC2(C(C1CCC(O)C1)CN(C)O)CCCC2                                                           |           |    |       |       |       |       |
| Dexmethylphenidate   | TRUE                                                                                                          | 38.33  | 38.33  | 3                                                                    | 1                                                                                       | 233.30615 | 17 | 0.47  | 2.56  | 9.51  |       |
|                      | 2.54                                                                                                          | 2.18   | 0.5    | 1                                                                    | O=C([C@H]([C@H]1NCCC1)C2=CC=CC=C2)OC                                                    |           |    |       |       |       |       |
| Dextromethorphan     | TRUE                                                                                                          | 12.47  | 12.47  | 2                                                                    | 0                                                                                       | 271.3972  | 20 | 2.39  | 3.94  | 9.13  |       |
|                      | 4.11                                                                                                          | 3.674  | 0.67   | 1                                                                    | CN1CC[C@]23CCCC[C@]2[C@]3([C@H]1)C4C3CC(C4)OC                                           |           |    |       |       |       |       |
| Dicyclomine          | TRUE                                                                                                          | 29.54  | 29.54  | 3                                                                    | 0                                                                                       | 309.4867  | 22 | 4.23  | 6.14  | 9.24  | 6.05  |
|                      | 5.105                                                                                                         | 0.95   | 0      | O=C(OCCN(C)C)C1(CCCCC1)C2CCCC2                                       |                                                                                         |           |    |       |       |       |       |
| Diethylpropion       | TRUE                                                                                                          | 20.31  | 20.31  | 2                                                                    | 0                                                                                       | 205.29606 | 15 | 1.84  | 2.85  | 8.49  |       |
|                      | 2.95                                                                                                          | 2.757  | 0.46   | 1                                                                    | O=C(ClCCCC1)C(N(C)C)CO                                                                  |           |    |       |       |       |       |
| Difenoxin            | TRUE                                                                                                          | 64.33  | 64.33  | 4                                                                    | 1                                                                                       | 424.53412 | 32 | 2.53  | 3.55  | 9.17  | 5.04  |
|                      | 5.114                                                                                                         | 0.29   | 3      | C(CCN1CCC(Cc1)(C(O)=O)C2=CC=CC=C2)(C3=CC=CC=C3)(C4=CC=CC=C4)C#N      |                                                                                         |           |    |       |       |       |       |
| Dihydrocodeine       | TRUE                                                                                                          | 41.93  | 41.93  | 4                                                                    | 1                                                                                       | 301.38011 | 22 | 0.26  | 1.26  | 8.43  |       |
|                      | 1.39                                                                                                          | 1.947  | 0.67   | 1                                                                    | O[C@H]1[C@]2OC3=C(O)C=C[C@]2([C@H]5CC1)CCN(C)[C@H]5C4                                   |           |    |       |       |       |       |
| Diltiazem            | TRUE                                                                                                          | 59.08  | 84.38  | 6                                                                    | 0                                                                                       | 414.51783 | 29 | 2.26  | 3.65  | 8.94  | 3.63  |
|                      | 3.093                                                                                                         | 0.36   | 2      | O=C2N(C3C(S[C@H]1(C1CCC(O)C1)[C@H]2OC(=O)CCCC3)CCN(C)C               |                                                                                         |           |    |       |       |       |       |
| Diphenylpyraline     | TRUE                                                                                                          | 12.47  | 12.47  | 2                                                                    | 0                                                                                       | 281.39202 | 21 | 3.49  | 3.21  | 8.78  |       |
|                      | 4.54                                                                                                          | 3.357  | 0.37   | 2                                                                    | O(C(C1CCCC1)C2CCCC2)C3CCN(C)CC3                                                         |           |    |       |       |       |       |
| Disulfiram           | TRUE                                                                                                          | 6.48   | 121.26 | 4                                                                    | 0                                                                                       | 296.5392  | 16 | 3.88  | 3.88  | 3.88  |       |
|                      | 4.551                                                                                                         | 0.8    | 0      | CCN(C)C(=S)SSC(=S)N(C)CC                                             |                                                                                         |           |    |       |       |       |       |
| Dolasetron           | TRUE                                                                                                          | 62.4   | 62.4   | 1                                                                    | 1                                                                                       | 324.3737  | 24 | 2.79  | 2.34  | 6.22  | 2.82  |
|                      | 2.035                                                                                                         | 0.47   | 2      | O=C5CN4[C@H]1C[C@H]5C[C@H]4C[C@H](C1)OC(=O)C3CC2CCCC23               |                                                                                         |           |    |       |       |       |       |
| Donepezil            | TRUE                                                                                                          | 38.77  | 38.77  | 4                                                                    | 0                                                                                       | 379.49195 | 28 | 3.27  | 4.6   | 8.84  | 4.71  |
|                      | 4.569                                                                                                         | 0.46   | 2      | O=C2C1CC(O)C(O)C1CC2CC4CN(C3CCCC3)CC4                                |                                                                                         |           |    |       |       |       |       |
| Dronabino            | TRUE                                                                                                          | 29.46  | 29.46  | 2                                                                    | 1                                                                                       | 314.4617  | 23 | 7.68  | 7.24  | 7.68  |       |
|                      | 6.109                                                                                                         | 0.62   | 1      | CCCCC1CC(C2C1)OC([C@H]3[C@H]2C(C)C)C(O)O                             |                                                                                         |           |    |       |       |       |       |
| Dronedarone          | TRUE                                                                                                          | 88.85  | 97.22  | 5                                                                    | 1                                                                                       | 556.75645 | 39 | 5.4   | 8.57  | 9.44  | 7.58  |
|                      | 7.015                                                                                                         | 0.52   | 3      | O=S(=O)(NC3CC1C(OC(C1=O)C2CCC(OCCN(C)CC)CC2)CCCC)C3)C                |                                                                                         |           |    |       |       |       |       |





|                  |       |        |        |       |                                                                                             |           |           |       |       |       |
|------------------|-------|--------|--------|-------|---------------------------------------------------------------------------------------------|-----------|-----------|-------|-------|-------|
| LevomEPROMAZINE  | TRUE  | 15.71  | 41.01  | 4     | 0                                                                                           | 328.47166 | 23        | 3.04  | 4.83  | 9.32  |
| 4.94             | 4.507 | 0.37   | 2      | 0     | (c2cc1n(c3c(sc1cc2)cccc3)[c@H](C)CN(C)C)C                                                   |           |           |       |       |       |
| LevomETHADYL     | TRUE  | 29.54  | 29.54  | 3     | 0                                                                                           | 353.49773 | 26        | 3.48  | 4.59  | 9.4   |
| 5.45             | 4.738 | 0.43   | 2      |       | [c@H](C(C1=CC=CC=C1)(C2=CC=CC=C2)C[C@@H](N(C)C)O)OC(C)=O)CC                                 |           |           |       |       |       |
| LevomILNACIPRAN  | TRUE  | 46.33  | 46.33  | 2     | 1                                                                                           | 246.34798 | 18        | -1.52 | 1.91  | 10.36 |
| 1.23             | 1.288 | 0.53   | 1      |       | CN(CC)C(=O)[C@H]1(C[C@H]1CN)C2=CC=CC=C2                                                     |           |           |       |       |       |
| LevopropoxyPHENE | TRUE  | 29.54  | 29.54  | 3     | 0                                                                                           | 339.47116 | 25        | 3.66  | 5.21  | 9.19  |
| 5.44             | 4.71  | 0.41   | 2      |       | CCCC(=O)OC(c1c1cccc1)(c2cccc2)C(C)CN(C)C                                                    |           |           |       |       |       |
| Lidocaine        | TRUE  | 32.34  | 32.34  | 1     | 1                                                                                           | 234.33728 | 17        | 1.84  | 1.95  | 8.53  |
| 2.626            | 0.5   | 1      | 0      |       | O=C(Nc1c(ccc1c)C)CN(CC)C                                                                    |           |           |       |       | 2.36  |
| Lofexidine       | TRUE  | 33.61  | 33.61  | 3     | 1                                                                                           | 259.13178 | 16        | 1.73  | 3.46  | 3.59  |
| 2.765            | 0.36  | 1      | 1      |       | C1c2c(OC(C/1=N/CCN\1)C)C(Cl)ccc2                                                            |           |           |       |       | 9.8   |
| Lomustine        | TRUE  | 61.77  | 61.77  | 3     | 1                                                                                           | 233.69524 | 15        | 2.76  | 2.75  | 2.76  |
| 3.469            | 0.89  | 0      | 0      |       | O=C(NC1CCCC1)N(N=O)CC1                                                                      |           |           |       |       |       |
| Loratadine       | TRUE  | 42.43  | 42.43  | 3     | 0                                                                                           | 382.88321 | 27        | 5.94  | 5.05  | 4.22  |
| 5                | 0.36  | 2      | 0      |       | O=C(OCC)N4CC/C(=C2/c1ccc(Cl)cc1CCc3ccccc23)CC4                                              |           |           |       |       | 5.94  |
| Lorazepam        | TRUE  | 61.69  | 61.69  | 3     | 2                                                                                           | 321.15809 | 21        | 2.47  | 2.37  | 2.47  |
| 3.509            | 0.07  | 2      |        |       | C1C1=CC=CC=C1C2=NC(C(NC3=CC=CC=C3)C1=O)O                                                    |           |           |       |       |       |
| Lorcainide       | TRUE  | 23.55  | 23.55  | 2     | 0                                                                                           | 370.91558 | 26        | 3.18  | 4.48  | 9.31  |
| 4.356            | 0.41  | 2      |        |       | C1c3ccc(N(C(=O)C1cccc1)C2CN(C(C)O)CC2)cc3                                                   |           |           |       |       | 4.9   |
| Lorcaserin       | TRUE  | 12.03  | 12.03  | 1     | 1                                                                                           | 195.68856 | 13        | 0.41  | 3.24  | 9.99  |
| 2.747            | 0.45  | 1      | 1      |       | C1c1cc2c(cc1)CNC[C@@H]2C                                                                    |           |           |       |       | 2.89  |
| Losartan         | TRUE  | 92.51  | 92.51  | 5     | 2                                                                                           | 422.91062 | 30        | 1.58  | 4.5   | 3.56  |
| 4.59             | 0.27  | 4      |        |       | C1c1cn(n(c1CO)C4ccc(c2cccc2c3nnn3)C4)CCCC                                                   |           |           |       |       |       |
| Lovastatin       | TRUE  | 72.83  | 72.83  | 5     | 1                                                                                           | 404.53963 | 29        | 4.07  | 4.08  | 4.07  |
| 4.218            | 0.75  | 0      | 0      |       | O=C(O[C@@H]1[C@@H]3C=C([C@@H](CO)1)C=C/[C@@H]([C@@H]3CC[C@H]2OC(=O)C([@H](O)C2)C[C@@H](C)CC |           |           |       |       | 4.07  |
| Lurasidone       | TRUE  | 84.99  | 84.99  | 5     | 0                                                                                           | 492.67603 | 35        | 3.66  | 6.12  | 8.41  |
| 5.375            | 0.68  | 2      |        |       | C1CC[C@H]([C@@H](Cl)C2CNC(C)C2)C3=NSC4=CC=CC=C3)CN5C(=O)[C@H]6[C@@H]7CC[C@@H](C7)[C@H]6C5=O |           |           |       |       | 4.52  |
| Maprotiline      | TRUE  | 12.03  | 12.03  | 2     | 1                                                                                           | 1.66      | 1.66      | 4.52  | 10.62 | 4.51  |
| 4.116            | 0.4   | 2      |        |       | CNCCC[C@@]12c3=CC=CC=C3[C@@H](C4=CC=CC=C14)CC2                                              |           |           |       |       |       |
| Maraviroc        | TRUE  | 63.05  | 63.05  | 4     | 1                                                                                           | 513.66554 | 37        | 1.07  | 3.26  | 3.6   |
| 3.921            | 0.69  | 2      |        |       | C5=NNC(N5[C@@H]1C[C@H]4C[C@@H](Cl)N4CC[C@@H](NC(=O)C2CCC(F)C)CC2)C3CCCC(C)C(C)C             |           |           |       |       | 10.24 |
| Mazindol         | TRUE  | 35.83  | 35.83  | 3     | 1                                                                                           | 284.74022 | 20        | -0.72 | 3.38  | 13.1  |
| 2.963            | 0.19  | 2      |        |       | C1C1=CC=C(C2(C3=CC=CC=C3C4=NC(N4)O)C=C1                                                     |           |           |       |       | 1.28  |
| Mecamylamine     | TRUE  | 12.03  | 12.03  | 1     | 1                                                                                           | 167.29113 | 12        | 0.01  | 2.83  | 11.35 |
| 3.06             | 2.183 | 1      | 0      |       | N([C@@]2([C@@H]1CC[C@@H](Cl)C2(C)C)C)C                                                      |           |           |       |       |       |
| Mefloquine       | TRUE  | 45.15  | 45.15  | 3     | 2                                                                                           | 378.31215 | 26        | 1.14  | 3.67  | 9.24  |
| 4.302            | 0.47  | 2      |        |       | FC(F)(F)c2cccc1c(cc(nc12)C(F)F)[C@@H](O)[C@@H]3NCCC3                                        |           |           |       |       | 2.87  |
| Memantine        | TRUE  | 26.02  | 26.02  | 1     | 1                                                                                           | 179.30184 | 13        | 0.26  | 3.03  | 10.79 |
| 1.907            | 1     | 0      |        |       | N12cc3(cc(c1)cc(c2)c3)C                                                                     |           |           |       |       | 3.18  |
| Meperidine       | TRUE  | 29.54  | 29.54  | 3     | 0                                                                                           | 247.33274 | 18        | 1.78  | 2.23  | 2.35  |
| 2.445            | 0.53  | 1      | 0      |       | O=C(C1(CCN(C1)C)C2=CC=CC=C2)OCC                                                             |           |           |       |       |       |
| Mesoridazine     | TRUE  | 23.55  | 23.55  | 68.06 | 4                                                                                           | 0         | 386.57393 | 26    | 1.58  | 4.44  |
| 3.98             | 4.451 | 0.43   | 2      |       | O=S(=O)C2CC1(c3c(sc1cc2)cccc3)CC4N(C)CCCC4C                                                 |           |           |       |       | 9.63  |
| Metergoline      | TRUE  | 46.5   | 46.5   | 3     | 1                                                                                           | 403.51666 | 30        | 4.04  | 4.69  | 9.54  |
| 4.249            | 0.4   | 3      |        |       | O=C(OCC1cccc1)NC[C@@H]3C[C@@H]4c5cccc2c5c(cn2C)C[C@@H]4N(C3)C                               |           |           |       |       | 4.72  |
| Metformin        | TRUE  | 88.99  | 88.99  | 2     | 4                                                                                           | 129.16364 | 9         | -4.3  | -1.63 | 13.1  |
| -0.547           | 0.5   | 0      |        |       | CN(C)C(=N)NC(=N)N                                                                           |           |           |       |       | -2.31 |
| Methamphetamine  | TRUE  | 12.03  | 12.03  | 1     | 1                                                                                           | 149.2328  | 11        | -0.79 | 1.89  | 10.38 |
| 1.94             | 2.066 | 0.4    | 1      |       | N(Cc1cccc1)C                                                                                |           |           |       |       |       |
| Metharbital      | TRUE  | 66.48  | 66.48  | 3     | 1                                                                                           | 198.21906 | 14        | 1.13  | 1.14  | 1.18  |
| 1.669            | 0.67  | 0      |        |       | O=C1N(C(=O)NC(=O)C1(CO)CC)C                                                                 |           |           |       |       |       |
| Methdilazine     | TRUE  | 6.48   | 6.48   | 31.78 | 3                                                                                           | 0         | 296.4298  | 21    | 2.42  | 4.51  |
| 4.91             | 4.112 | 0.33   | 2      |       | S2c1cccc1N(c3c2cccc3)CC4CN(C)C4                                                             |           |           |       |       | 10.09 |
| Methixene        | TRUE  | 3.24   | 3.24   | 28.54 | 2                                                                                           | 0         | 309.46831 | 22    | 3.43  | 9.81  |
| 5.073            | 0.4   | 1      |        |       | C1=CC=CC=C1C(C2=C(C=CC=C2)S3)CC4CN(C)CC4)C                                                  |           |           |       |       | 5.46  |
| Methocarbamol    | TRUE  | 91.01  | 91.01  | 5     | 1                                                                                           | 241.2405  | 17        | 0.55  | 0.15  | 0.15  |
| 1.55             | 0.916 | 0.36   | 1      |       | O=C(OCC(O)COC1CCCC1OC)N                                                                     |           |           |       |       |       |
| Methylergonovine | TRUE  | 68.36  | 68.36  | 3     | 3                                                                                           | 339.43139 | 25        | 1.39  | 1.76  | 7.69  |
| 1.68             | 2.063 | 0.45   | 2      |       | CC[C@@H](CO)NC(=O)[C@@H]2/C=C1/C3CCCC4N=C(C\CC[H]1N(C)C2)C34                                |           |           |       |       |       |
| Methypylon       | TRUE  | 46.17  | 46.17  | 2     | 1                                                                                           | 183.24748 | 13        | 0.23  | 1.78  | 0.23  |
| 1.473            | 0.8   | 0      |        |       | C(Cl(C(C(C(NC1=O)C)=O)CC)C                                                                  |           |           |       |       |       |
| Metoclopramide   | TRUE  | 67.58  | 67.58  | 4     | 2                                                                                           | 299.79638 | 20        | 0.35  | 2.23  | 9.65  |
| 2.22             | 1.775 | 0.5    | 1      |       | C1c1cc(c(OC)cc1N)C(=O)NCCN(C)CC                                                             |           |           |       |       |       |
| Metoprolol       | TRUE  | 50.72  | 50.72  | 4     | 2                                                                                           | 267.3639  | 19        | -0.31 | 1.49  | 9.45  |
| 1.757            | 0.6   | 1      |        |       | O(C1CCC(CC1)CCO)CC(O)CNC(C)C                                                                |           |           |       |       | 1.79  |
| Metyrapone       | TRUE  | 42.85  | 42.85  | 3     | 0                                                                                           | 226.27376 | 17        | 1.19  | 1.46  | 6.11  |
| 1.847            | 0.21  | 2      |        |       | O=C(Clccncl)C(c2cccc2)C(C)C                                                                 |           |           |       |       | 1.19  |
| Mexiletine       | TRUE  | 35.25  | 35.25  | 2     | 1                                                                                           | 179.25878 | 13        | 0.96  | 2.57  | 8.58  |
| 2.334            | 0.45  | 1      |        |       | O(C1c(cccc1C)O)CC(N)C                                                                       |           |           |       |       | 2.16  |
| Mifepristone     | TRUE  | 40.54  | 40.54  | 3     | 0                                                                                           | 429.59369 | 32        | 4.94  | 4.65  | 5.49  |
| 4.95             | 5.655 | 0.55   | 1      |       | O=C5C=C4/C=C3([C@@H](C1CCC(N(C)O)C1)C[C@]2([C@@H](CC(C)2(C#CC)O)[C@@H]3CC4)C)CC5            |           |           |       |       |       |
| Minaprine        | TRUE  | 50.28  | 50.28  | 5     | 1                                                                                           | 298.38278 | 22        | 1.71  | 3.19  | 7.09  |
| 2.819            | 0.41  | 2      |        |       | CC1=CC(=NN=C1NCCN2COC2)C3=CC=CC=C3                                                          |           |           |       |       | 1.83  |
| Mirtazapine      | TRUE  | 19.37  | 19.37  | 3     | 0                                                                                           | 265.35286 | 20        | 2.15  | 3.32  | 8.1   |
| 3.094            | 0.35  | 2      |        |       | n1cccc3c1N4C(c2cccc2c3)CN(C)CC4                                                             |           |           |       |       | 2.75  |
| Moclobemide      | TRUE  | 41.57  | 41.57  | 3     | 1                                                                                           | 268.73928 | 18        | 0.77  | 2.17  | 6.89  |
| 1.528            | 0.46  | 1      |        |       | C1c1ccc(cc1)C(=O)NCCN2COC2C                                                                 |           |           |       |       | 0.84  |
| Molindone        | TRUE  | 45.33  | 45.33  | 3     | 1                                                                                           | 276.37396 | 20        | 1.89  | 2.57  | 6.89  |
| 2.14             | 0.69  | 1      |        |       | O=C2c1c(c(nc1CCC2N3COC3)O)CC                                                                |           |           |       |       | 1.96  |
| Nabilone         | TRUE  | 46.53  | 46.53  | 3     | 1                                                                                           | 372.54083 | 27        | 7.05  | 6.72  | 7.05  |
| 6.055            | 0.71  | 1      |        |       | O=C3CC[C@@H]1[C@@H](c2c(OC1)C)cc(cc2O)C(C)C)CCCCC3                                          |           |           |       |       |       |
| Nalmefene        | TRUE  | 52.93  | 52.93  | 4     | 2                                                                                           | 339.4281  | 25        | 2.09  | 2.64  | 7.68  |
| 2.82             | 0.62  | 1      |        |       | OC(Cl=C2[C@@H]34[C@@H]5O1)=CC=C2[C@@H](N(CC4)CC6CC6)[C@]3(O)CCC5=C                          |           |           |       |       | 2.65  |
| Naloxegol        | TRUE  | 126.77 | 126.77 | 12    | 2                                                                                           | 651.78472 | 46        | -1.14 | 6.51  | -1.07 |
| 0.952            | 0.76  | 1      |        |       | COCCOCCOCCOCCOCCOCCO[C@@H]1C[C@]2([C@@H]3C=C4CC(=E5E4[C@]2([C@@H]105)CCN3CC=C)O)O           |           |           |       |       |       |
| Naratriptan      | TRUE  | 65.2   | 73.58  | 3     | 2                                                                                           | 335.46429 | 23        | -0.65 | 1.7   | 9.63  |
| 2.054            | 0.53  | 2      |        |       | O=S(=O)(NC)CCc3ccc1c(c(cn1)C2CCN(C)C2)c3                                                    |           |           |       |       | 1.35  |
| Nebivolol        | TRUE  | 70.95  | 70.95  | 5     | 3                                                                                           | 405.435   | 29        | 2.34  | 3.5   | 8.65  |
| 3.557            | 0.45  | 2      |        |       | Fc4cc1c(OC(CC1)C(O)CNC(O)C3OC2ccc(F)cc2CC3)cc4                                              |           |           |       |       | 3.67  |
| Nefazodone       | TRUE  | 51.62  | 51.62  | 5     | 0                                                                                           | 470.00687 | 33        | 3.29  | 6.23  | 8.25  |
| 4.415            | 0.44  | 2      |        |       | C1c4cccc(N3CCN(CCCN1)/N=C(N(C1=O)CCOC2cccc2)CC)CC3)c4                                       |           |           |       |       | 3.5   |
| Nemonapride      | TRUE  | 53.6   | 53.6   | 4     | 2                                                                                           | 387.90304 | 27        | 2.02  | 4.2   | 8.36  |
| 3.504            | 0.38  | 2      |        |       | CC1c(CCN1CC2=CC=CC=C2)NC(=O)C3=CC(=C(C=3OC)NC)C1                                            |           |           |       |       | 3.08  |
| Nicardipine      | TRUE  | 113.69 | 113.69 | 8     | 1                                                                                           | 479.52495 | 35        | 4.88  | 5.23  | 7.3   |
| 3.488            | 0.31  | 2      |        |       | O=C(OCCN(Cc1cccc1)C)\C2=C(N/C=C/C(=O)OC)C2c3cccc([NH+](O-))=O)C)C                           |           |           |       |       | 5.13  |
| Nicergoline      | TRUE  | 56.59  | 56.59  | 5     | 0                                                                                           | 484.38553 | 31        | 4.3   | 4.07  | 7.78  |
| 3.461            | 0.42  | 3      |        |       | BrC1cc(cnc1)C(=O)OC[C@@H]3C[C@]4(O)C5Cccc2c5c(cn2C)C[C@@H]4N(C3)C                           |           |           |       |       | 4.34  |
| Nicotine         | TRUE  | 16.13  | 16.13  | 2     | 0                                                                                           | 162.23155 | 12        | -0.47 | 0.88  | 8     |
| 1.242            | 0.5   | 1      |        |       | CN(CCC1)[C@@H]1C2=CC=CC=C2                                                                  |           |           |       |       | 0.72  |
| Nifedipine       | TRUE  | 110.44 | 110.44 | 7     | 1                                                                                           | 346.33462 | 25        | 2.97  | 3.12  | 2.69  |
| 1.766            | 0.29  | 1      |        |       | O=C(O)C1=C(N/C=C/C(=O)OC)C1c2cccc2[N+](O-)=O)C)C                                            |           |           |       |       | 2.97  |
| Nortriptyline    | TRUE  | 12.03  | 12.03  | 12.03 | 1                                                                                           | 263.37674 | 20        | 3.17  | 4.32  | 10    |
| 5.65             | 4.236 | 0.26   | 2      |       | C3cc2c(/c(Clcc1cccc1)CC2)=C/CNC)CC3                                                         |           |           |       |       |       |
| Noscapine        | TRUE  | 75.69  | 75.69  | 8     | 0                                                                                           | 413.42051 | 30        | 2.79  | 6.32  | 2.83  |
| 3.012            | 0.41  | 2      |        |       | O=C2O[C@@H](C1CCC(OC)C(OC)C12)[C@@H]5N(C)CCC4C5C(OC)C3OCOC3c4                               |           |           |       |       |       |
| Ondansetron      | TRUE  | 39.82  | 39.82  | 2     | 0                                                                                           | 293.36296 | 22        | 1.72  | 2.72  | 7.5   |
| 2.634            | 0.33  | 3      |        |       | O=C3c2c1cccc1n(c2CCC3cnc4cnc4)C                                                             |           |           |       |       |       |
| ospemifene       | TRUE  | 29.46  | 29.46  | 1     | 1                                                                                           | 378.89121 | 27        | 6.98  | 5.56  | 6.98  |
| 5.62             | 0.17  | 3      |        |       | C1CC/C(Cl=CC=CC=C1)=C(C2=CC=CC=C2)/C3=CC=C(C=C3)OCCO                                        |           |           |       |       |       |
| oxprenolol       | TRUE  | 50.72  | 50.72  | 4     | 2                                                                                           | 265.34802 | 19        | 0.18  | 2.09  | 9.45  |
| 2.232            | 0.47  | 1      |        |       | O(Clcccc1OC=C)CC(O)CNC(C)C                                                                  |           |           |       |       |       |

|                     |      |        |        |   |   |           |    |       |      |       |       |
|---------------------|------|--------|--------|---|---|-----------|----|-------|------|-------|-------|
| Oxybate             | TRUE | 57.53  | 57.53  | 3 | 2 | 104.10452 | 7  | -3.41 | 4.67 | -0.58 | -0.7  |
| Oxybutynin          | TRUE | 49.77  | 49.77  | 4 | 1 | 357.48643 | 26 | 4.29  |      | 4.87  | 8.24  |
| Oxyphencyclimine    | TRUE | 4.646  | 0.59   | 1 | 1 | 344.44792 | 25 | 2.7   |      |       | 10.91 |
| Palonosetron        | TRUE | 2.626  | 0.6    | 1 | 1 | 296.40665 | 22 | 0.81  |      |       | 9.77  |
| Panobinostat        | TRUE | 2.61   | 0.63   | 1 | 1 | 349.42622 | 26 | 1.63  |      |       | 9.29  |
| Paramethadione      | TRUE | 3.027  | 0.19   | 3 | 0 | 157.16713 | 11 | 0.84  |      |       | 0.41  |
| Paroxetine          | TRUE | 1.537  | 0.71   | 0 | 0 | 329.3654  | 24 | 1.67  |      | 4.24  | 9.68  |
| Pazopanib           | TRUE | 3.229  | 0.37   | 2 | 2 | 437.51801 | 31 | 1.96  |      | 3.65  | 6.39  |
| Penbutolol          | TRUE | 119.03 | 127.41 | 7 | 2 | 291.42835 | 21 | 3.64  |      | 9.77  | 4.17  |
| Pentazocine         | TRUE | 3.741  | 0.19   | 4 | 1 | 285.42378 | 21 | 3     |      | 4.67  | 8.94  |
| Pentoxifylline      | TRUE | 41.48  | 41.48  | 3 | 2 | 278.30702 | 20 | 0.87  |      |       | 0.12  |
| Perampamel          | TRUE | 3.572  | 0.67   | 1 | 1 | 349.3847  | 27 | 3.7   |      | 4.17  | 3.7   |
| Pergolide           | TRUE | 56.99  | 56.99  | 3 | 0 | 314.48813 | 22 | 3.09  |      | 4.4   | 9.66  |
| Perindopril         | TRUE | 19.03  | 44.33  | 2 | 2 | 368.46777 | 26 | -0.19 | 3.15 | 1.21  | 5.67  |
| Phenacetamide       | TRUE | 4.11   | 0.58   | 2 | 0 | 178.1879  | 13 | 0.87  |      | 0.87  | 0.87  |
| Phenelzine          | TRUE | 95.94  | 72.19  | 1 | 2 | 136.19428 | 10 | 0.33  |      | 1.03  | 8.01  |
| Phenmetrazine       | TRUE | 2.437  | 0.84   | 2 | 1 | 177.2429  | 13 | 0.33  |      | 1.67  | 8.58  |
| Phenobarbital       | TRUE | 1.307  | 0.25   | 1 | 1 | 232.23528 | 17 | 1.45  | 7.31 | 1.36  | 1.36  |
| Phenoxybenzamine    | TRUE | 1.461  | 0.45   | 1 | 2 | 303.82638 | 21 | 4.72  |      | 4.92  | 6.58  |
| Phenylpropanolamine | TRUE | 1.67   | 1.709  | 1 | 0 | 151.20562 | 11 | -1.07 |      | 0.58  | 8.47  |
| Phenylephrine       | TRUE | 4.78   | 46.25  | 2 | 2 | 252.26798 | 19 | 2.49  |      | 2.08  | 2.52  |
| Phenytoin           | TRUE | 0.81   | 0.802  | 1 | 1 | 461.54616 | 34 | 4.99  |      | 6.4   | 9.67  |
| Pimozide            | TRUE | 2.299  | 0.07   | 2 | 2 | 356.4387  | 25 | 1.89  | 6.35 | 3.53  | 5.53  |
| Pioglitazone        | TRUE | 35.58  | 35.58  | 3 | 3 | 185.22184 | 14 | 1.82  |      | 2.4   | 1.82  |
| Pirfenidone         | TRUE | 5.521  | 0.32   | 3 | 1 | 211.32708 | 14 | -0.54 |      | 1.17  | 9.47  |
| Pramipexole         | TRUE | 1.905  | 0.08   | 1 | 3 | 373.4411  | 26 | 3.17  |      | 3.43  | 4.07  |
| Prasugrel           | TRUE | 50.94  | 79.17  | 3 | 2 | 312.40605 | 23 | 2.44  |      | 3.36  | 3.36  |
| Praziquantel        | TRUE | 1.713  | 0.7    | 1 | 1 | 235.32534 | 17 | -0.79 |      | 1.42  | 9.86  |
| Procainamide        | TRUE | 3.988  | 46.61  | 2 | 4 | 221.29875 | 16 | 0.08  |      | -0.08 | 7.85  |
| Procabazine         | TRUE | 2.44   | 0.46   | 1 | 1 | 373.94265 | 25 | 4     |      | 4.38  | 8.64  |
| Prochlorperazine    | TRUE | 4.61   | 4.697  | 2 | 2 | 178.27072 | 13 | 4.16  |      | 3.93  | 4.16  |
| Propofol            | TRUE | 20.23  | 20.23  | 1 | 1 | 259.34344 | 19 | 0.98  |      | 2.75  | 9.43  |
| Propranolol         | TRUE | 3.976  | 0.5    | 1 | 3 | 165.2322  | 12 | -0.96 |      | 0.89  | 9.38  |
| Pseudoephedrine     | TRUE | 41.48  | 41.48  | 2 | 2 | 123.1127  | 9  | -0.37 |      | -0.68 | -0.68 |
| Pyracitamide        | TRUE | 2.54   | 0.38   | 1 | 0 | 248.71142 | 17 | 2.55  |      | 3     | 6.78  |
| Pyrilamine          | TRUE | 1.05   | 1.234  | 1 | 2 | 382.52062 | 29 | 2.79  |      | 2.79  | 2.79  |
| Pyrimethamine       | TRUE | -0.37  | -1.041 | 0 | 1 | 383.50709 | 27 | 1.48  |      | 2.99  | 6.76  |
| Pyrvinium           | TRUE | 2.871  | 0.35   | 4 | 0 | 259.34344 | 19 | 2.57  |      | 2.48  | 2.57  |
| Quetiapine          | TRUE | 3.086  | 0.35   | 2 | 1 | 171.23832 | 13 | 2.14  |      | 2.52  | 7.49  |
| Ramelteon           | TRUE | 2.656  | 0.38   | 2 | 1 | 313.39082 | 23 | 1.8   |      | 3.26  | 8.37  |
| Rasagiline          | TRUE | 2.826  | 12.03  | 1 | 1 | 376.44671 | 27 | 2     |      | 1.96  | 6.56  |
| Reboxetine          | TRUE | 3.119  | 0.33   | 4 | 1 | 234.1983  | 15 | 2.84  |      | 3.23  | 3.41  |
| Remifentanyl        | TRUE | 3.077  | 39.72  | 2 | 2 | 179.30184 | 13 | 0.19  |      | 3.96  | 10.76 |
| Riluzole            | TRUE | 2.05   | 1.666  | 1 | 1 | 463.78734 | 30 | 6.01  |      | 6.47  | 3.22  |
| Rimantadine         | TRUE | 4.159  | 0.12   | 2 | 2 | 410.48448 | 30 | 2.09  |      | 2.71  | 8.21  |
| Rimonabant          | TRUE | 26.02  | 26.02  | 1 | 0 | 250.33668 | 18 | 0.93  |      | 2.1   | 8.62  |
| Risperidone         | TRUE | 2.04   | 0      | 3 | 1 | 269.34486 | 20 | -0.97 |      | 1.18  | 9.49  |
| Rivastigmine        | TRUE | 50.16  | 50.16  | 3 | 1 | 314.35566 | 22 | 1.34  |      | 1.8   | 1.34  |
| Rizatriptan         | TRUE | 7.001  | 0.27   | 4 | 0 | 274.40114 | 20 | 2.72  |      | 3.16  | 8.36  |
| Rofecoxib           | TRUE | 60.44  | 68.81  | 4 | 0 | 238.19352 | 17 | 0.05  |      | 0.51  | 0.05  |
| Ropinirole          | TRUE | 2.871  | 0.12   | 2 | 2 | 238.19352 | 17 | 0.05  |      | 0.51  | 0.05  |
| Ropivacaine         | TRUE | 32.34  | 32.34  | 1 | 1 | 440.94084 | 34 | 4.08  |      | 5.27  | 9.1   |
| Rufinamide          | TRUE | 3.854  | 0.59   | 1 | 3 | 187.28078 | 14 | 2.58  |      | 3.02  | 2.95  |
| Saxagliptin         | TRUE | 73.8   | 73.8   | 3 | 1 | 440.94084 | 34 | 4.08  |      | 5.27  | 9.1   |
| Selegiline          | TRUE | 0.1    | 0.1    | 2 | 1 | 306.22958 | 20 | 2.77  |      | 5.35  | 9.47  |
| Sertindole          | TRUE | 40.51  | 40.51  | 2 | 2 |           |    |       |      |       |       |
| Sertraline          | TRUE | 4.68   | 12.03  | 3 | 1 |           |    |       |      |       |       |
|                     | TRUE | 12.03  | 0.29   | 2 | 2 |           |    |       |      |       |       |
|                     | TRUE | 4.996  | 0.29   | 2 | 2 |           |    |       |      |       |       |

|                 |      |          |        |      |   |           |    |       |       |       |       |
|-----------------|------|----------|--------|------|---|-----------|----|-------|-------|-------|-------|
| Sulindac        | TRUE | 54.37    | 73.58  | 3    | 1 | 356.41058 | 25 | 0.55  | 4.26  | 3.16  | 3.59  |
| Suvorexant      | TRUE | 3.639    | 80.29  | 2    | 0 | 450.92071 | 32 | 3.62  |       | 5.4   | 4.12  |
| Tacrine         | TRUE | 4.108    | 0.3    | 4    | 0 | 198.26366 | 15 | 1.26  |       | 3.27  | 9.64  |
| Tadalafil       | TRUE | 2.789    | 0.31   | 2    | 1 | 389.40396 | 29 | 1.43  |       | 2.58  | 1.43  |
| Talipexole      | TRUE | 2.183    | 0.27   | 3    | 0 | 209.3112  | 14 | 1.02  |       | 1.14  | 7.22  |
| Tamoxifen       | TRUE | 1.644    | 12.47  | 1    | 0 | 371.51455 | 28 | 6.58  |       | 6.82  | 8.69  |
| Tapentadol      | TRUE | 6.319    | 0.23   | 3    | 0 | 221.33852 | 16 | 1.21  |       | 3.15  | 9.45  |
| Tasimelteon     | TRUE | 3.466    | 0.57   | 1    | 0 | 245.31686 | 18 | 1.75  |       | 1.89  | 1.75  |
| Telmisartan     | TRUE | 38.33    | 38.33  | 2    | 1 | 514.61689 | 39 | 4.74  | 3.83  | 7.29  | 5.87  |
| Temozolomide    | TRUE | 2.203    | 0.53   | 1    | 0 | 194.15083 | 14 |       | -1.31 |       | -0.81 |
| Terbinafine     | TRUE | 5.20E-02 | 0.17   | 1    | 0 | 291.42989 | 22 | 6.49  |       | 5.96  | 6.92  |
| Terguride       | TRUE | 5.335    | 0.33   | 2    | 0 | 340.46252 | 25 | 2.65  |       | 2.78  | 9.78  |
| Teriflunomide   | TRUE | 2.65     | 0.55   | 2    | 0 | 270.20726 | 19 |       |       | 5.2   | 2.13  |
| Tetrabenazine   | TRUE | 2.51     | 2.091  | 1    | 0 | 317.42257 | 23 |       | 3.43  | 3.46  | 6.46  |
| Thiopental      | TRUE | 3.48     | 3.365  | 0.63 | 1 | 242.33782 | 16 |       | -0.92 | 1.85  | 10.72 |
| Thiothixene     | TRUE | 61.69    | 93.78  | 0    | 0 | 443.62525 | 30 | 3.42  |       | 3.23  | 8.17  |
| Tiagabine       | TRUE | 3.12     | 43.86  | 2    | 0 | 375.54799 | 25 | 3.18  |       | 2.77  | 9.48  |
| Tianeptine      | TRUE | 3.533    | 0.39   | 2    | 0 | 436.95219 | 29 | 0.02  |       | 4.75  | 1.52  |
| Timolol         | TRUE | 4.832    | 0.45   | 2    | 0 | 316.41966 | 21 | -1.2  |       | 1.72  | 9.57  |
| Tizanidine      | TRUE | 86.71    | 95.09  | 5    | 0 | 253.71131 | 16 | 0.31  |       | 2.09  | 8.67  |
| Tocainide       | TRUE | 3.927    | 0.38   | 2    | 0 | 192.25754 | 14 | 0.32  |       | 0.26  | 8.1   |
| Tolcapone       | TRUE | 1.127    | 0.85   | 1    | 0 | 273.24084 | 20 | 1.8   | 4.78  | 3.25  | 4.07  |
| Tolmetin        | TRUE | 1.445    | 103.35 | 5    | 2 | 257.28449 | 19 | -1.52 | 4.22  | 2.21  | 1.55  |
| Topotecan       | TRUE | 3.13     | 0.07   | 2    | 0 | 421.44581 | 31 | 0.44  |       | 0.73  | 7.65  |
| Tramadol        | TRUE | 59.3     | 59.3   | 3    | 0 | 263.37519 | 19 | 0.49  |       | 3.1   | 9.61  |
| Tranylcypromine | TRUE | 3.267    | 103.2  | 7    | 2 | 133.19034 | 10 | 0.36  |       | 1.48  | 8.78  |
| Trazodone       | TRUE | 1.577    | 0.35   | 2    | 0 | 371.86388 | 26 | 1.49  |       | 4.35  | 8.11  |
| Trimipramine    | TRUE | 32.7     | 42.39  | 4    | 0 | 294.43383 | 22 | 3.21  |       | 5.44  | 9.38  |
| Tropisetron     | TRUE | 2.7      | 0.37   | 1    | 0 | 278.39138 | 21 | 2.7   |       | 3.63  | 8.99  |
| Valdecoxib      | TRUE | 4.836    | 0.4    | 2    | 0 | 441.53987 | 31 | 3.94  |       | 6.34  | 5.58  |
| Valproic acid   | TRUE | 16.13    | 16.13  | 2    | 0 | 284.35289 | 21 | 1.04  |       | 2.88  | 10    |
| Varenicline     | TRUE | 4.075    | 0.32   | 2    | 0 | 314.35895 | 22 | 1.7   |       | 1.83  | 1.71  |
| Vilazodone      | TRUE | 84.86    | 0.42   | 2    | 0 | 144.21143 | 10 | 0.16  |       | 4.82  | 2.76  |
| Vinpocetine     | TRUE | 5.876    | 0.88   | 0    | 0 | 211.26242 | 16 | -1.33 |       | 0.9   | 9.6   |
| Voriconazole    | TRUE | 45.33    | 37.81  | 3    | 1 | 441.52487 | 33 | 4.58  |       | 8.57  | 3.98  |
| Vortioxetine    | TRUE | 2.608    | 0.47   | 2    | 0 | 350.45403 | 26 | 4.54  |       | 4.83  | 7.8   |
| Zaleplon        | TRUE | 86.19    | 94.57  | 3    | 1 | 349.31046 | 25 | 0.93  |       | 0.52  | 2.72  |
| Ziprasidone     | TRUE | 2.6      | 0.06   | 3    | 0 | 264.3202  | 19 | 0.86  |       | 0.99  | 0.86  |
| Zolmitriptan    | TRUE | 37.29    | 37.29  | 1    | 0 | 298.44568 | 21 | 3.08  |       | 5.42  | 8.85  |
| Zolpidem        | TRUE | 2.72     | 0.88   | 0    | 0 | 305.33389 | 23 | 0.86  |       | 1.44  | 0.86  |
| Zonisamide      | TRUE | 37.81    | 37.81  | 3    | 1 | 412.93564 | 28 | 3.19  |       | 4.71  | 8.41  |
|                 | TRUE | 1.038    | 0.38   | 2    | 0 | 287.35683 | 21 | -0.29 |       | 1.29  | 9.52  |
|                 | TRUE | 102.29   | 102.29 | 4    | 0 | 307.38953 | 23 | 3.01  |       | 3.03  | 6.25  |
|                 | TRUE | 4.536    | 0.31   | 4    | 0 | 212.22571 | 14 | -0.1  |       | -0.36 | -0.1  |
|                 | TRUE | 34.47    | 34.47  | 3    | 0 |           |    |       |       |       |       |
|                 | TRUE | 4.294    | 0.5    | 2    | 0 |           |    |       |       |       |       |
|                 | TRUE | 0.93     | 2.072  | 3    | 0 |           |    |       |       |       |       |
|                 | TRUE | 78.43    | 78.43  | 3    | 0 |           |    |       |       |       |       |
|                 | TRUE | 1.838    | 0.43   | 1    | 0 |           |    |       |       |       |       |
|                 | TRUE | 4.26     | 15.27  | 3    | 0 |           |    |       |       |       |       |
|                 | TRUE | 74.28    | 0.33   | 2    | 0 |           |    |       |       |       |       |
|                 | TRUE | 1.865    | 0.18   | 3    | 0 |           |    |       |       |       |       |
|                 | TRUE | 48.47    | 76.71  | 3    | 0 |           |    |       |       |       |       |
|                 | TRUE | 4.214    | 0.33   | 3    | 0 |           |    |       |       |       |       |
|                 | TRUE | 1.64     | 57.36  | 2    | 0 |           |    |       |       |       |       |
|                 | TRUE | 2.457    | 0.44   | 2    | 0 |           |    |       |       |       |       |
|                 | TRUE | 37.61    | 37.61  | 2    | 0 |           |    |       |       |       |       |
|                 | TRUE | 3.628    | 0.26   | 3    | 0 |           |    |       |       |       |       |
|                 | TRUE | 86.19    | 94.57  | 3    | 0 |           |    |       |       |       |       |
|                 | TRUE | 0.411    | 0.12   | 2    | 0 |           |    |       |       |       |       |
